# Supplementary material for: Deubiquitinase USP7 stabilizes KDM5B and promotes tumor progression and cisplatin resistance in nasopharyngeal carcinoma through the ZBTB16/TOP2A axis
Source: PubMed Central journal article supplement (PMC10923876; doi:10.1038/s41418-024-01257-x), 2024-01-29

**Figure 1 e**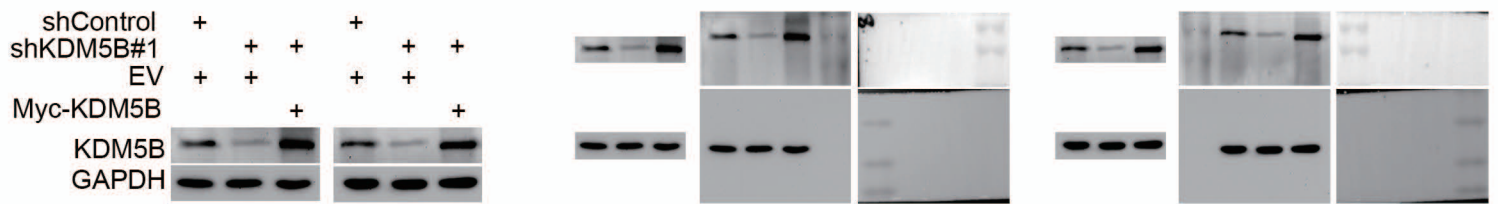**Figure 2 g**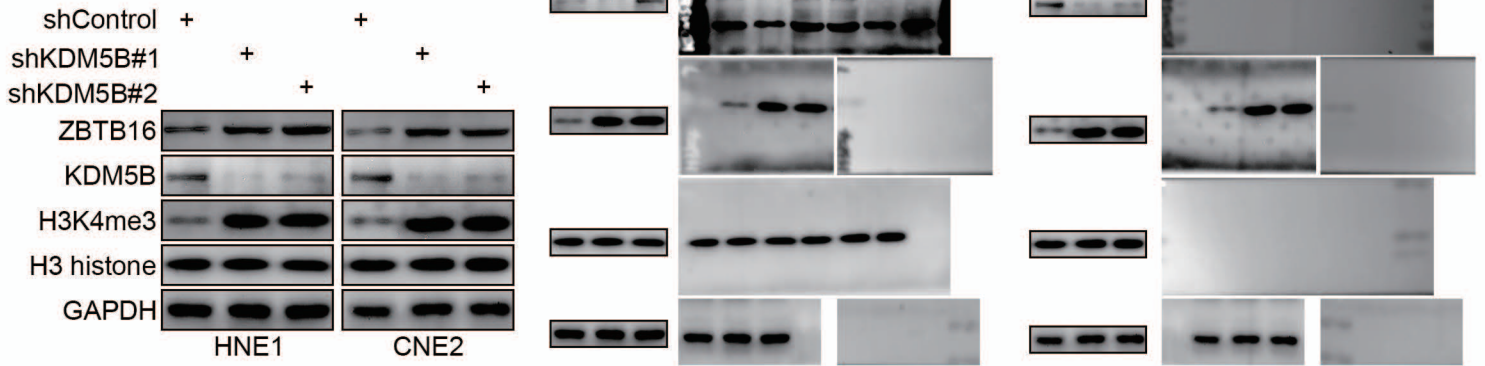**Figure 2 h**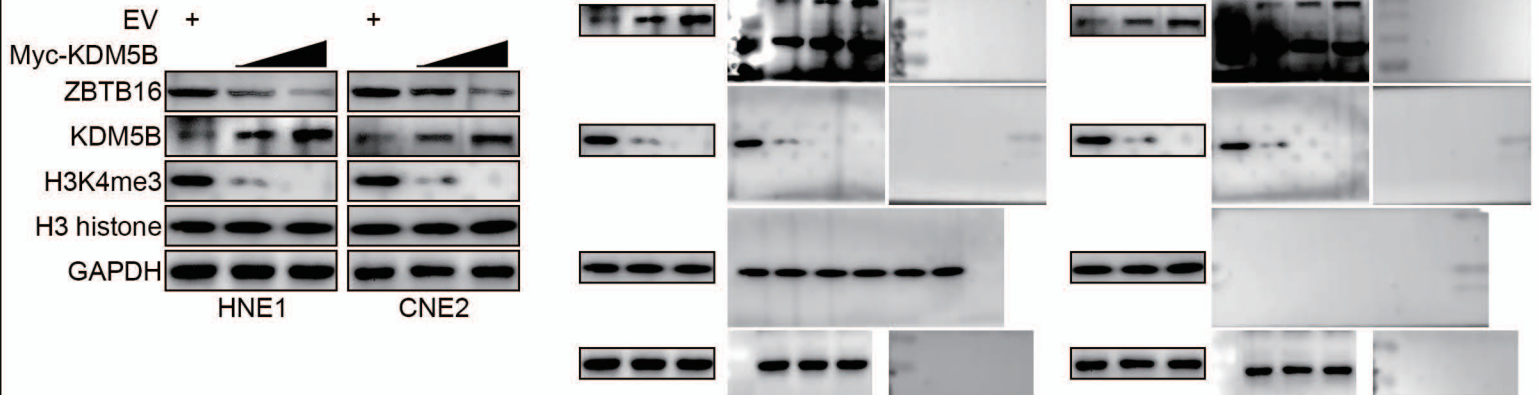**Figure 3 a**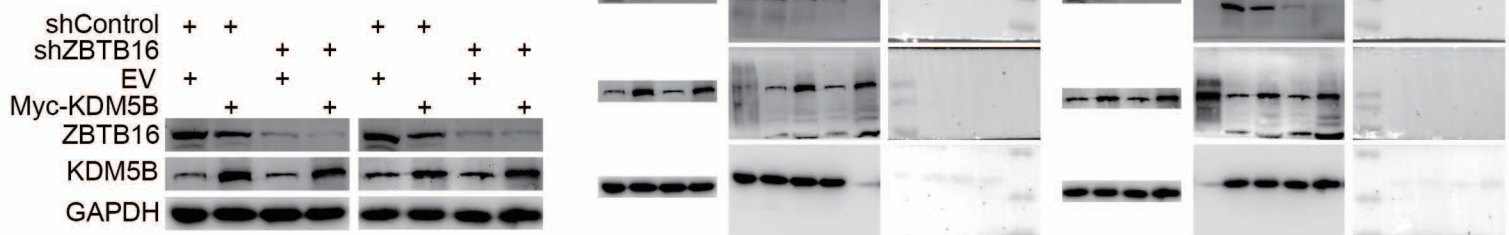**Figure 3 c**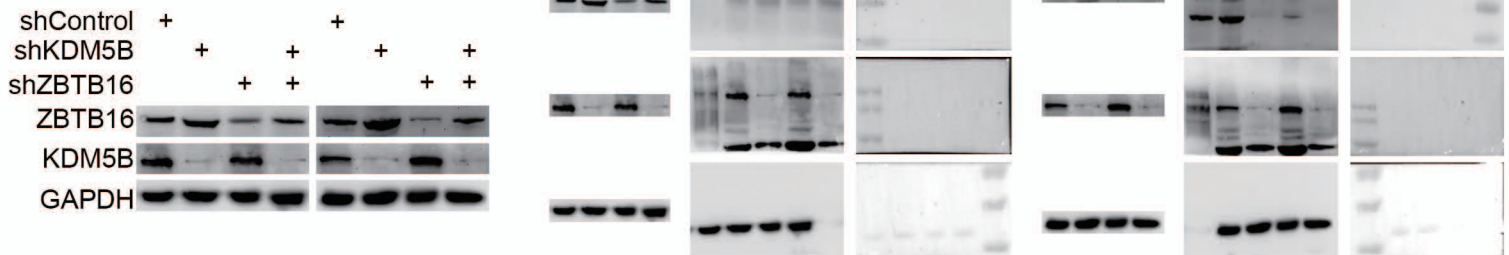

**Figure 4 g**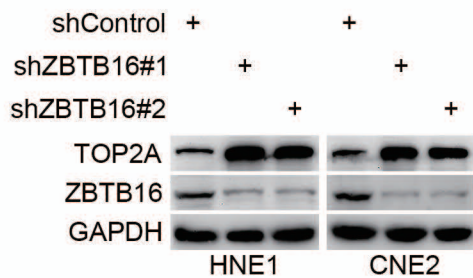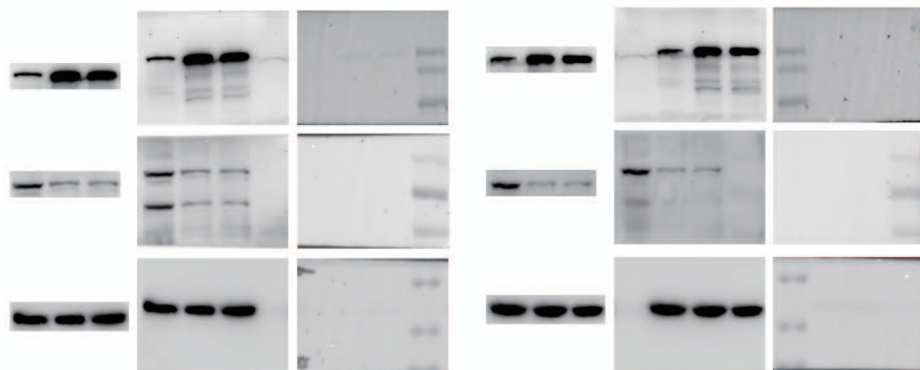**Figure 4 h**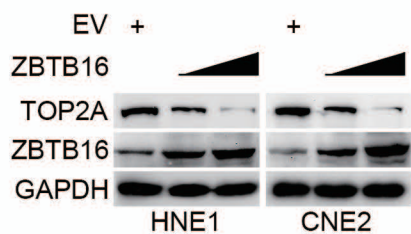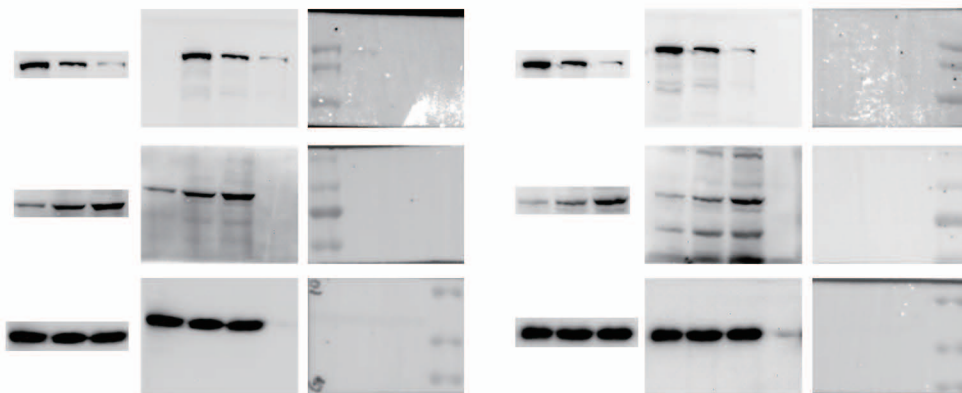**Figure 5 a**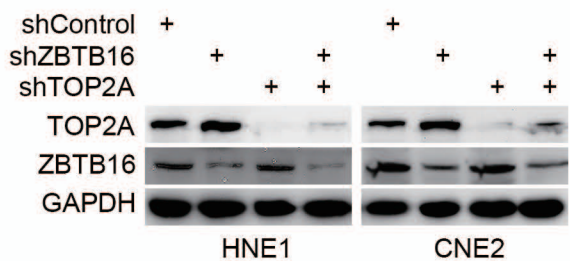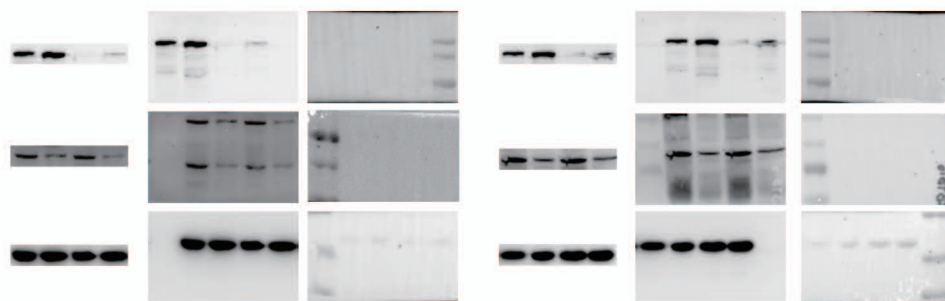**Figure 5 g**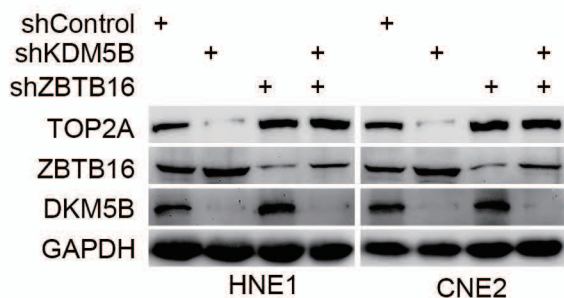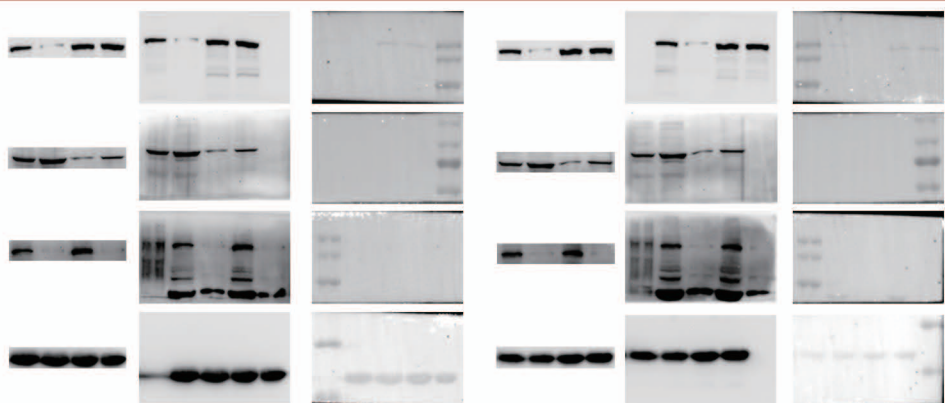



**Figure 6 c**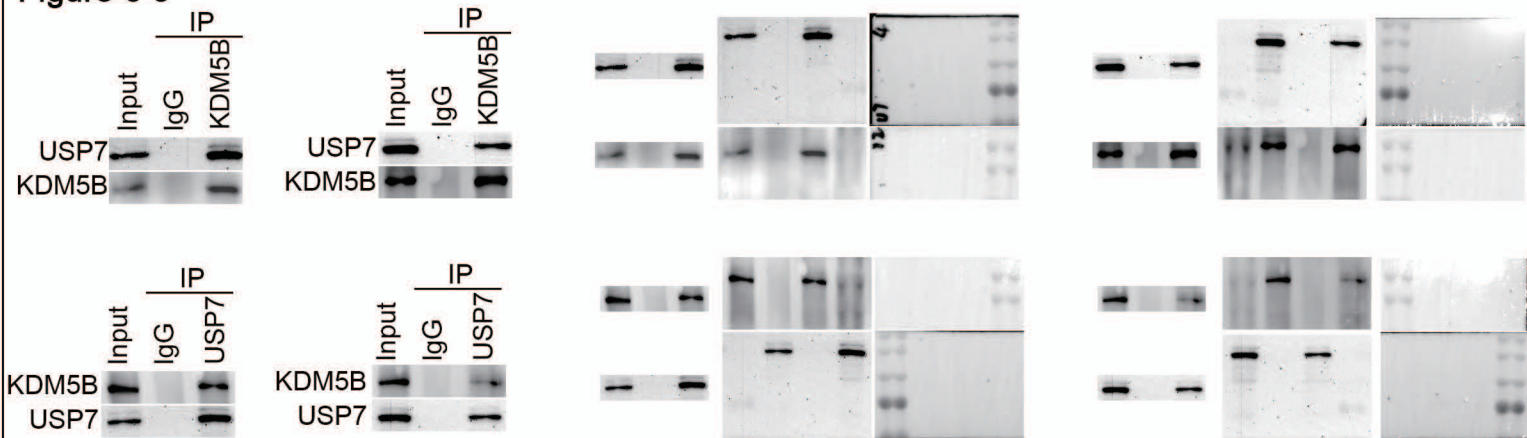**Figure 6 d**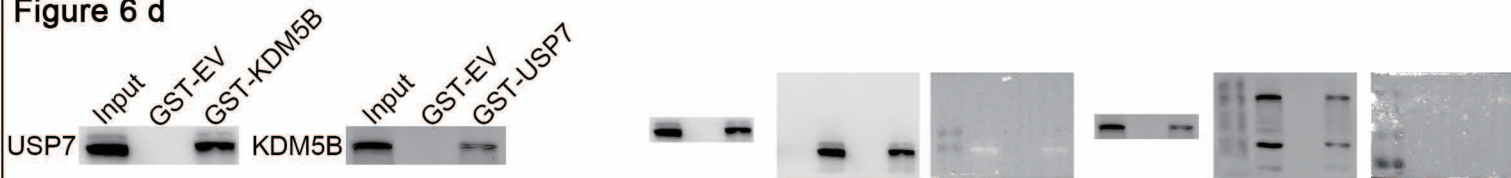**Figure 6 e**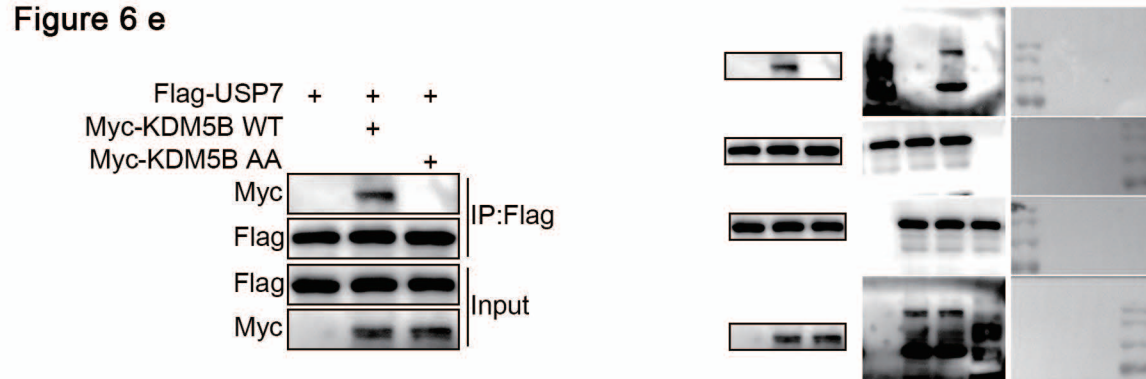**Figure 6 f**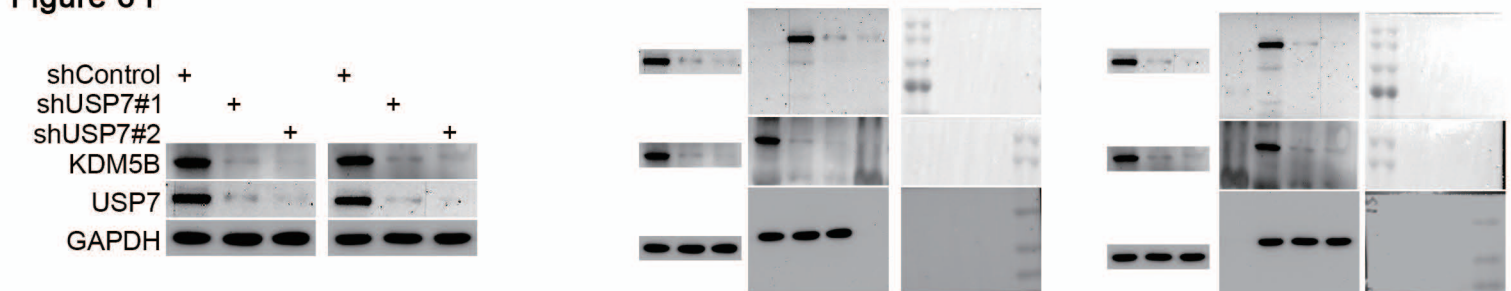**Figure 6 g**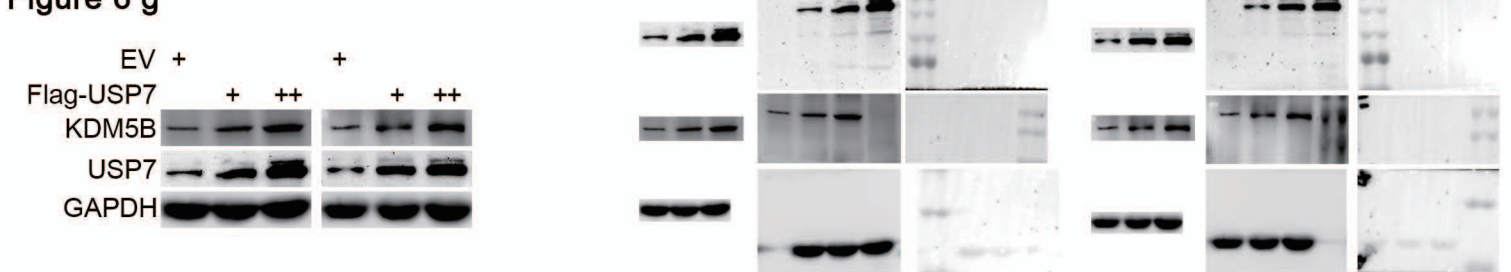**Figure 6 h**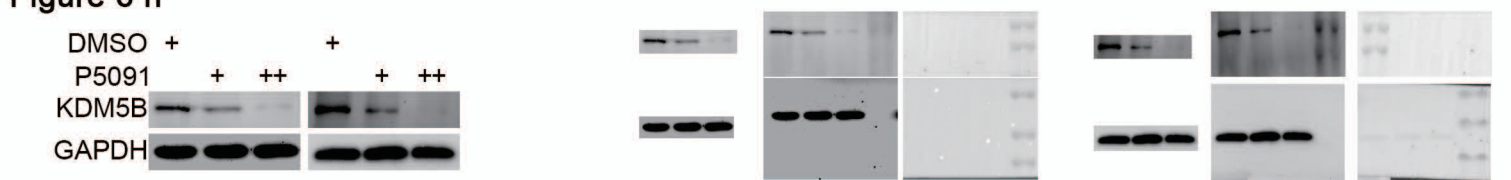

**Figure 6 i**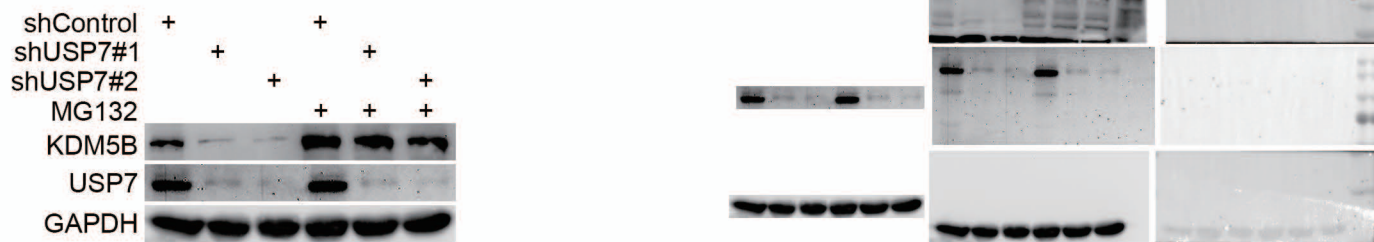**Figure 6 j**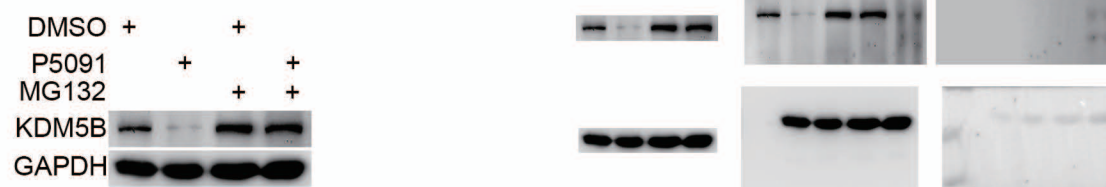**Figure 6 k**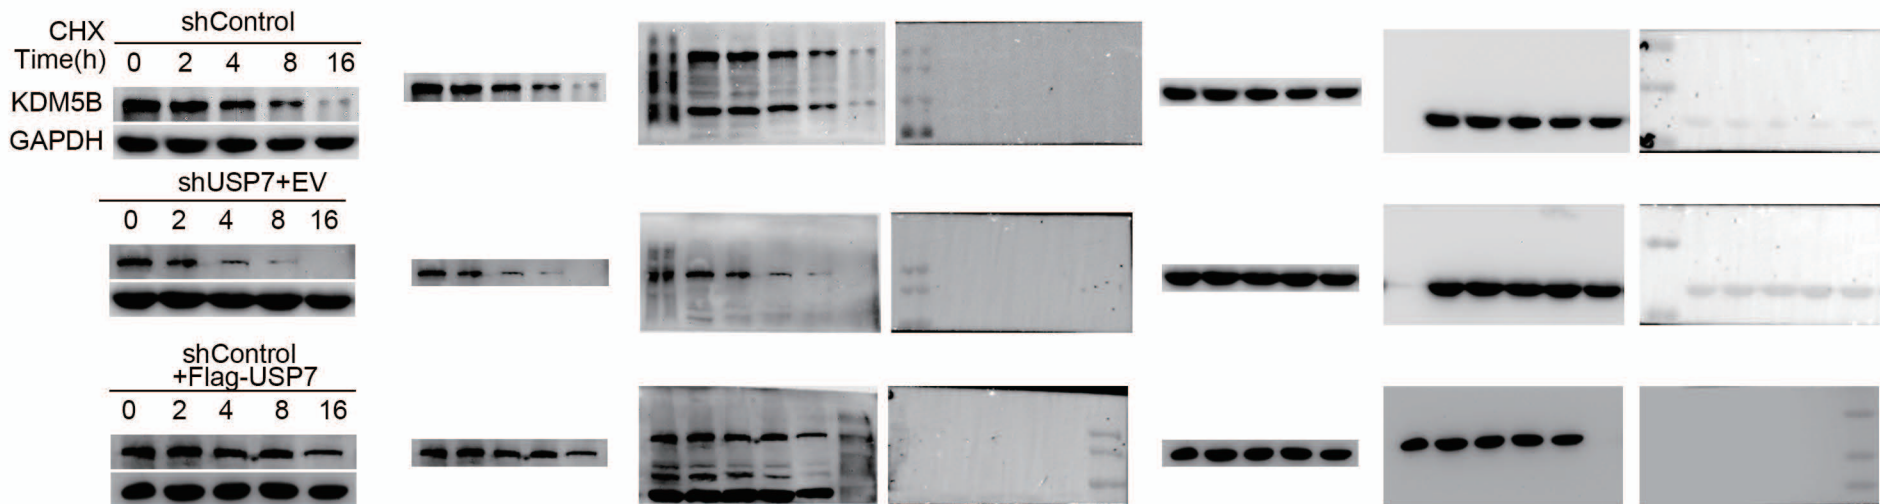**Figure 6 l**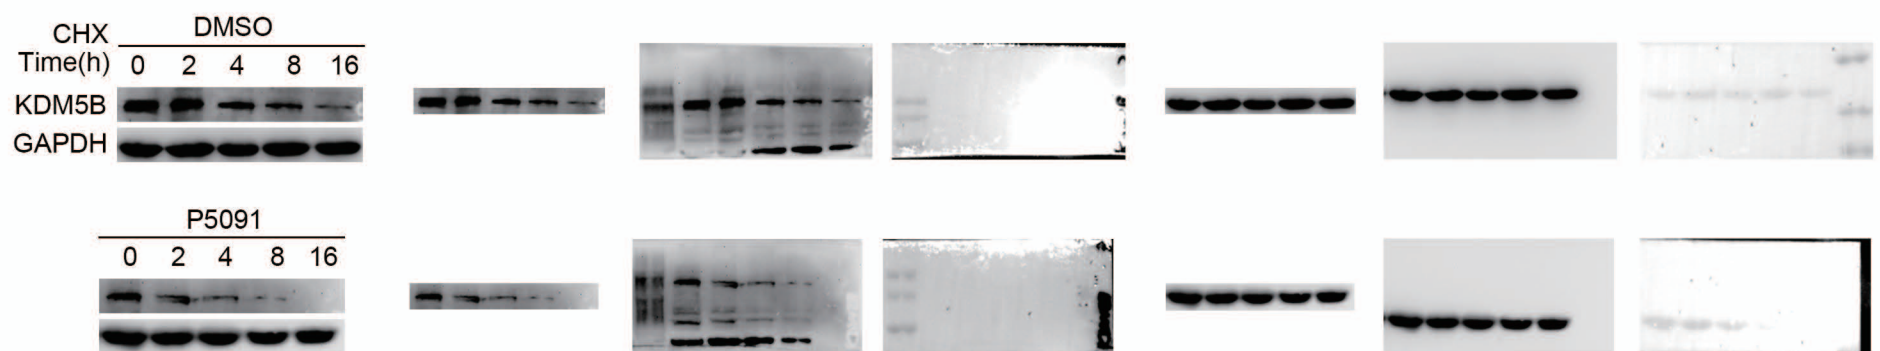**Figure 6 n**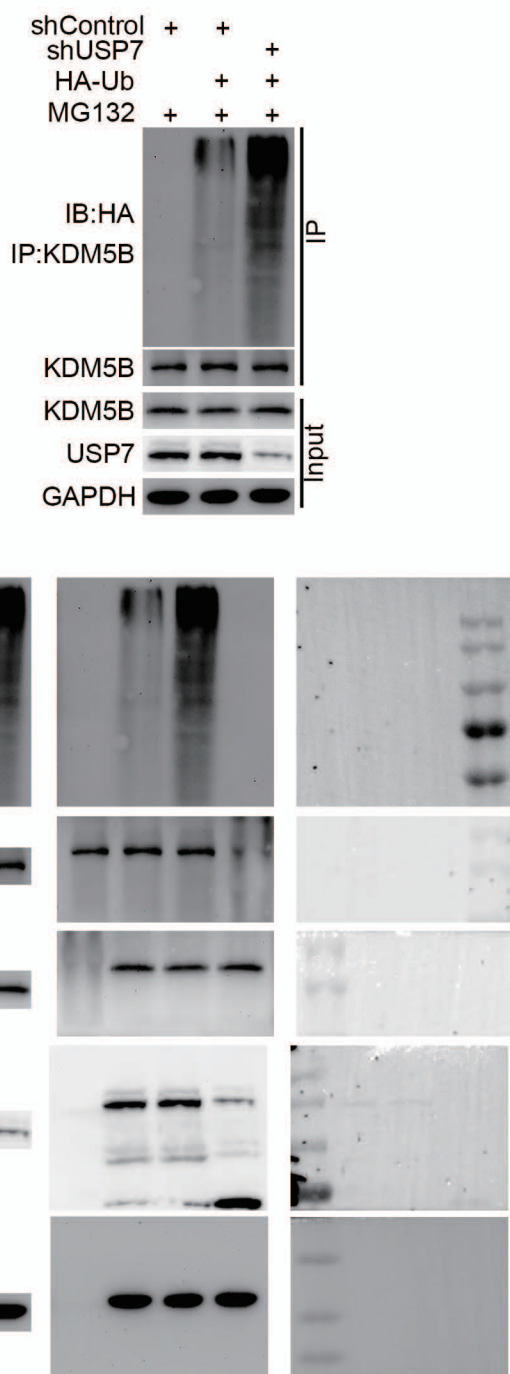**Figure 6 o**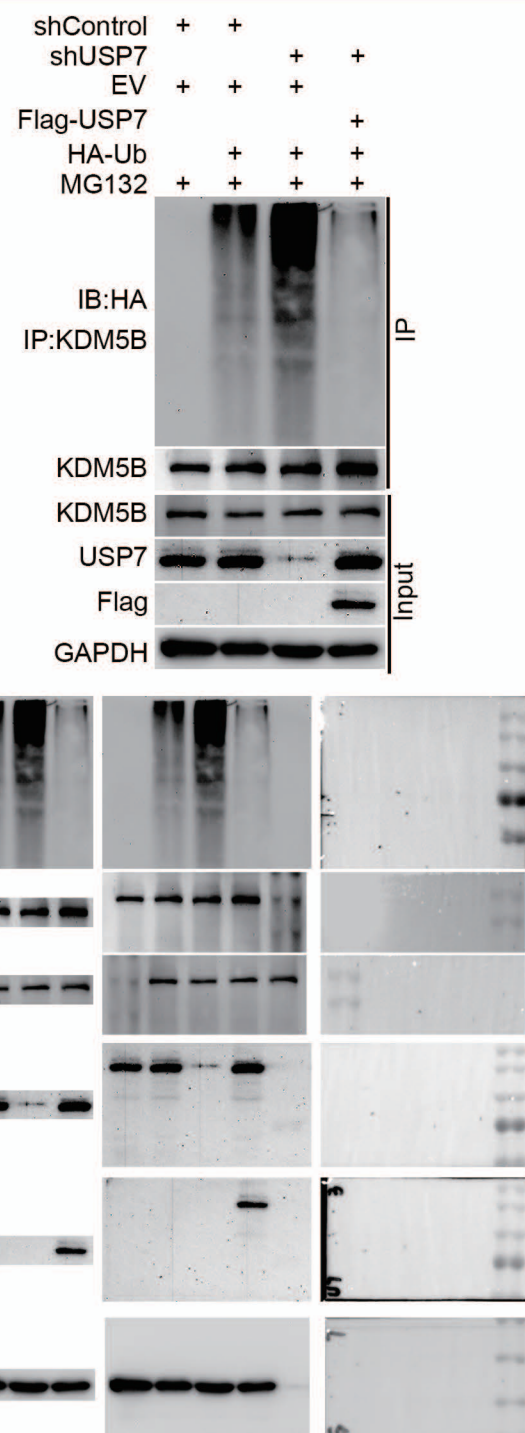



**Figure 7 a**

|           |                      |   |   |   |                      |   |   |   |
|-----------|----------------------|---|---|---|----------------------|---|---|---|
| shControl | +                    |   |   |   | +                    |   |   |   |
| shUSP7    |                      | + |   |   |                      | + |   |   |
| shKDM5B   |                      |   | + | + |                      |   | + | + |
| TOP2A     | [Western blot bands] |   |   |   | [Western blot bands] |   |   |   |
| ZBTB16    | [Western blot bands] |   |   |   | [Western blot bands] |   |   |   |
| KDM5B     | [Western blot bands] |   |   |   | [Western blot bands] |   |   |   |
| USP7      | [Western blot bands] |   |   |   | [Western blot bands] |   |   |   |
| GAPDH     | [Western blot bands] |   |   |   | [Western blot bands] |   |   |   |

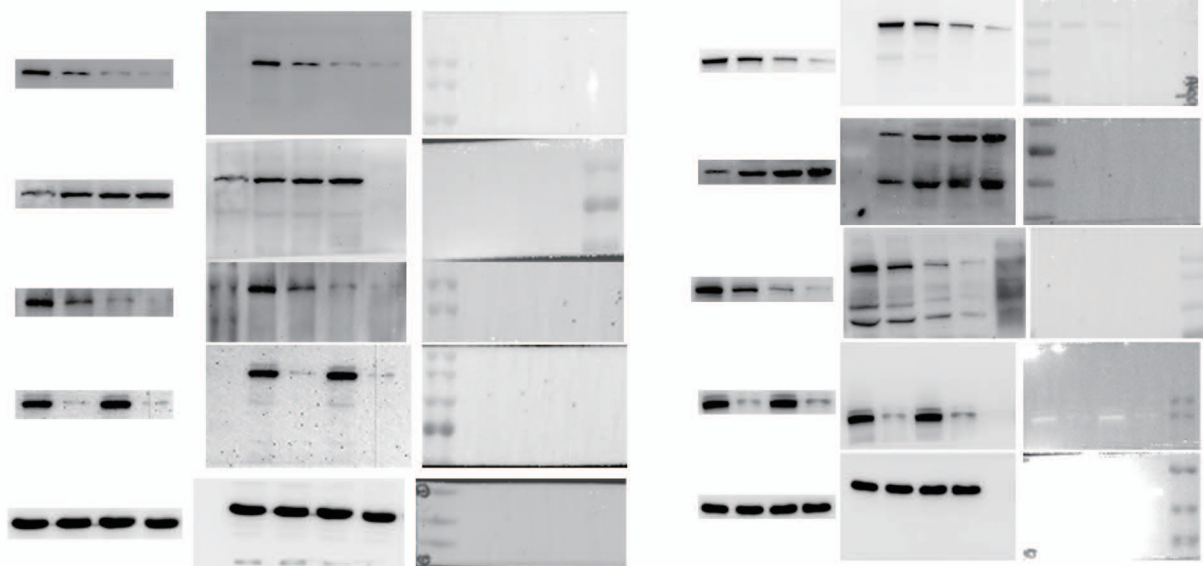

**Figure 7 b**

|           |                      |   |   |   |                      |   |   |   |
|-----------|----------------------|---|---|---|----------------------|---|---|---|
| shControl | +                    | + |   |   | +                    | + |   |   |
| shKDM5B   |                      |   | + | + |                      |   | + | + |
| DMSO      | +                    |   | + |   | +                    |   | + |   |
| P5091     |                      | + |   | + |                      | + |   | + |
| TOP2A     | [Western blot bands] |   |   |   | [Western blot bands] |   |   |   |
| ZBTB16    | [Western blot bands] |   |   |   | [Western blot bands] |   |   |   |
| KDM5B     | [Western blot bands] |   |   |   | [Western blot bands] |   |   |   |
| GAPDH     | [Western blot bands] |   |   |   | [Western blot bands] |   |   |   |

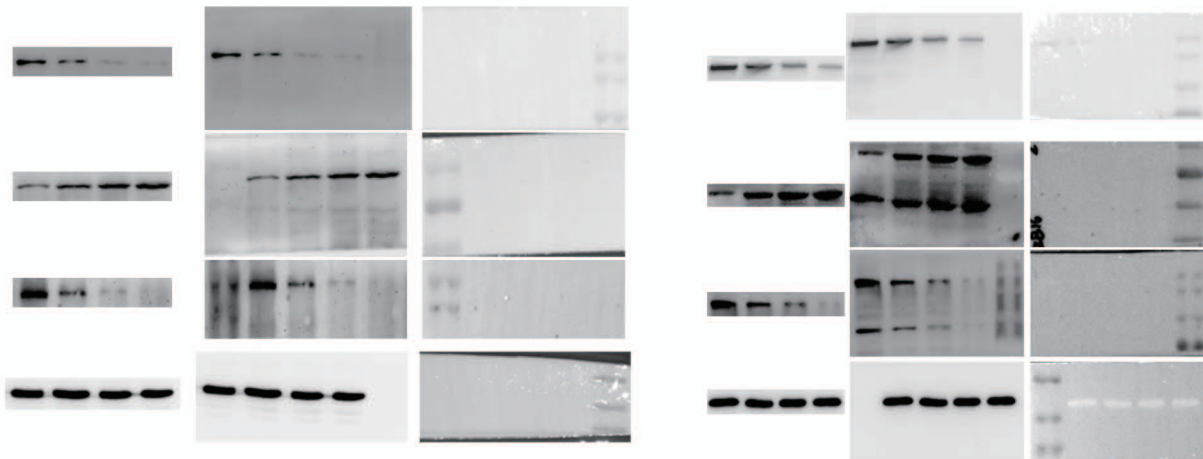

**Figure 7 c**

|           |                      |   |   |   |                      |   |   |   |
|-----------|----------------------|---|---|---|----------------------|---|---|---|
| shControl | +                    | + |   |   | +                    | + |   |   |
| shKDM5B   |                      |   | + | + |                      |   | + | + |
| EV        | +                    |   | + |   | +                    |   | + |   |
| Flag-USP7 |                      | + |   | + |                      | + |   | + |
| TOP2A     | [Western blot bands] |   |   |   | [Western blot bands] |   |   |   |
| ZBTB16    | [Western blot bands] |   |   |   | [Western blot bands] |   |   |   |
| KDM5B     | [Western blot bands] |   |   |   | [Western blot bands] |   |   |   |
| USP7      | [Western blot bands] |   |   |   | [Western blot bands] |   |   |   |
| GAPDH     | [Western blot bands] |   |   |   | [Western blot bands] |   |   |   |

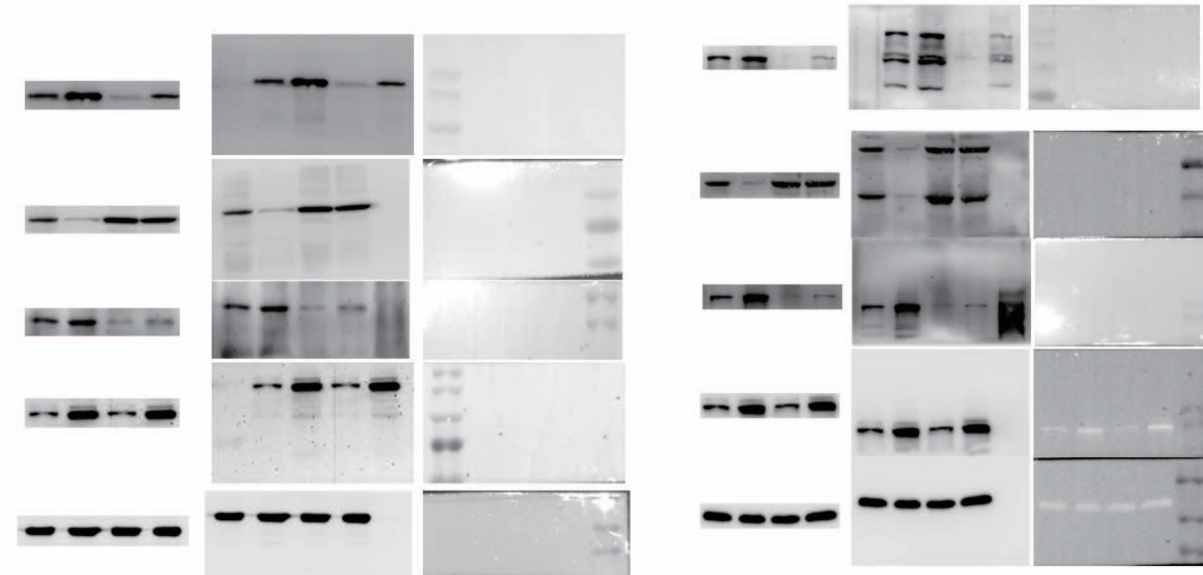

**Figure 7 d**

|           |                      |        |         |        |                      |        |         |          |
|-----------|----------------------|--------|---------|--------|----------------------|--------|---------|----------|
| shControl | +                    | +      | +       | +      |                      |        |         |          |
| shTOP2A   |                      |        |         |        | +                    | +      | +       | +        |
| DMSO      | +                    |        |         |        | +                    |        |         | +        |
| P5091     |                      | +      |         | +      |                      | +      |         |          |
| Cisplatin |                      |        | +       | +      |                      |        | +       | +        |
| TOP2A     | [Western blot bands] |        |         |        | [Western blot bands] |        |         |          |
| KDM5B     | [Western blot bands] |        |         |        | [Western blot bands] |        |         |          |
| USP7      | [Western blot bands] |        |         |        | [Western blot bands] |        |         |          |
| GAPDH     | [Western blot bands] |        |         |        | [Western blot bands] |        |         |          |
|           | ( I )                | ( II ) | ( III ) | ( IV ) | ( V )                | ( VI ) | ( VII ) | ( VIII ) |

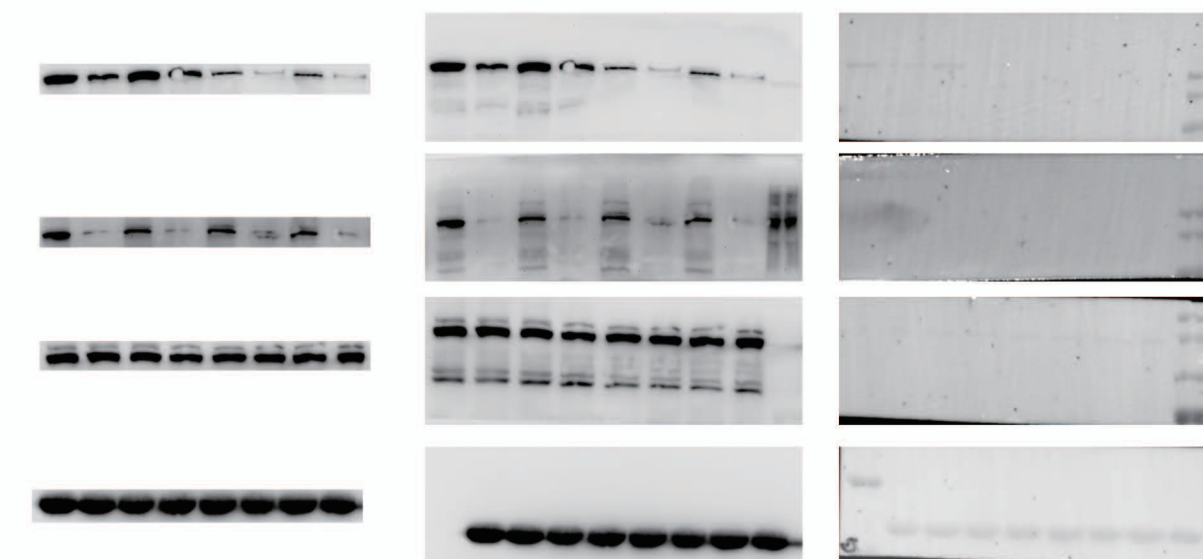

### Supplementary Figure 2 a

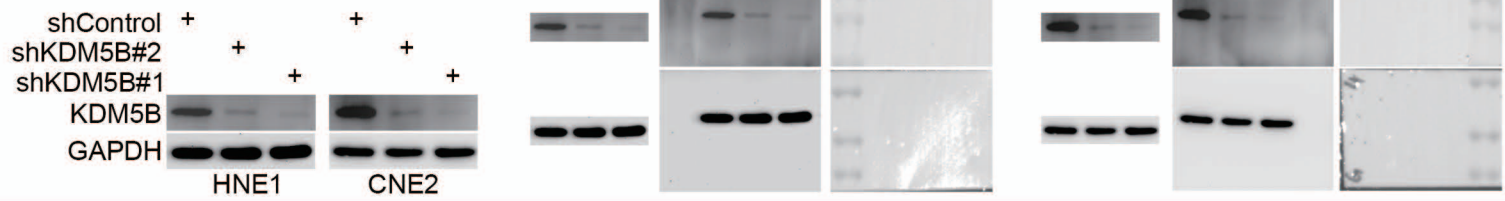

### Supplementary Figure 2 i

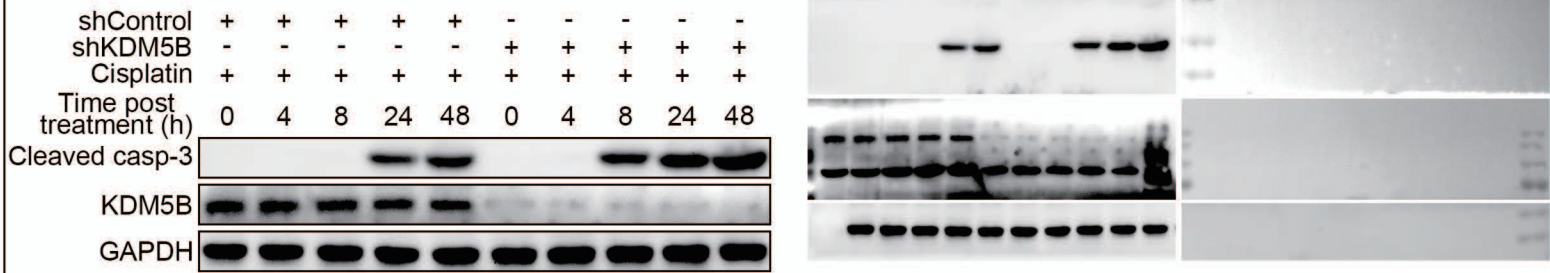

### Supplementary Figure 3 a

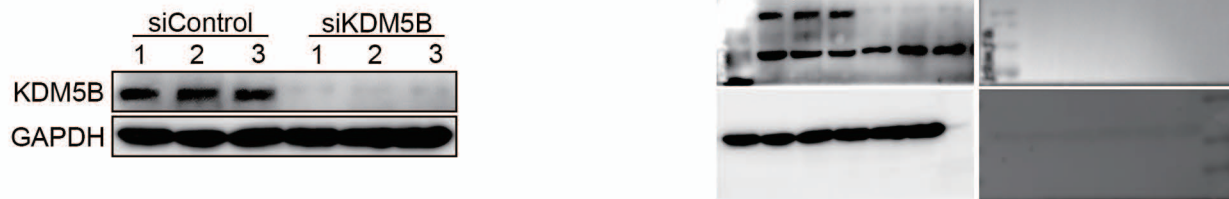

### Supplementary Figure 4 a

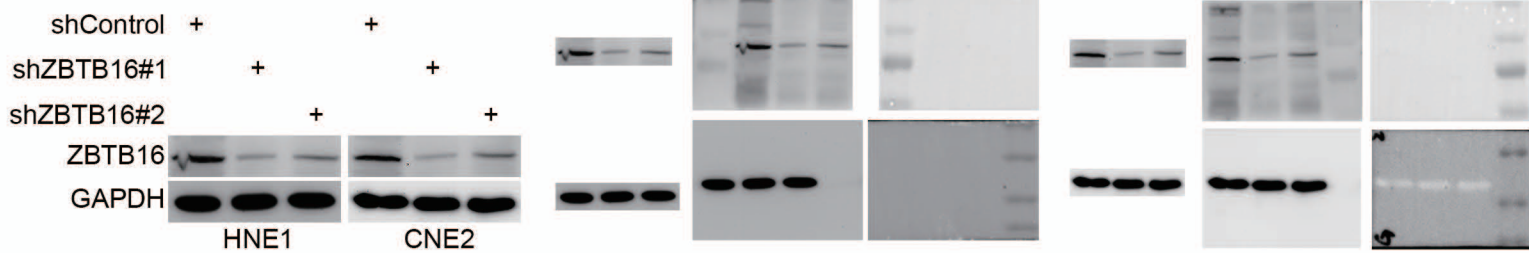

### Supplementary Figure 5 c

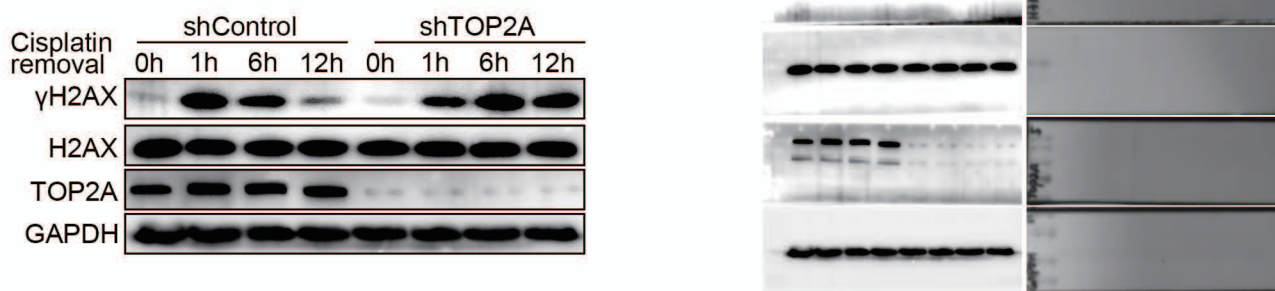

### Supplementary Figure 5 f

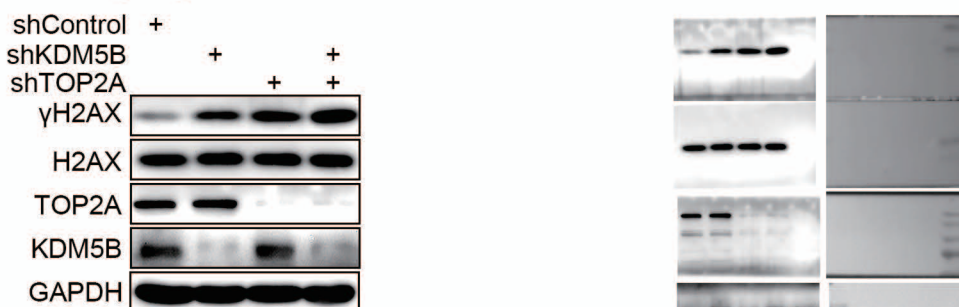



### Supplementary Figure 6 a

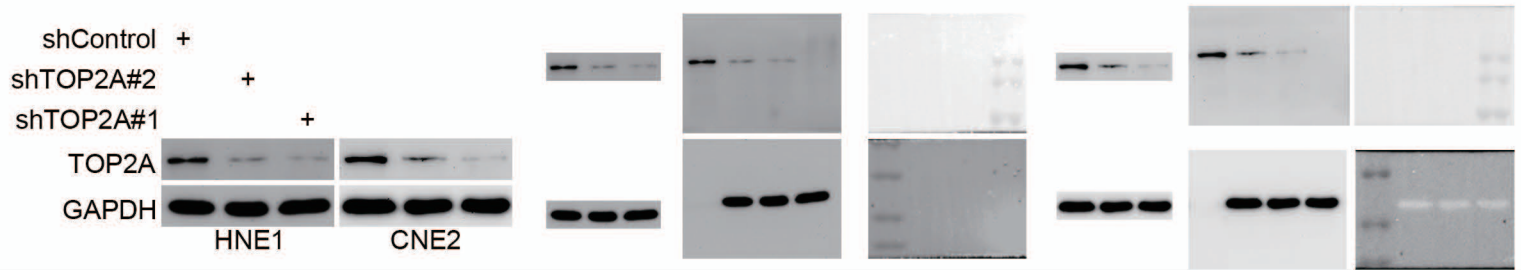

### Supplementary Figure 8 a

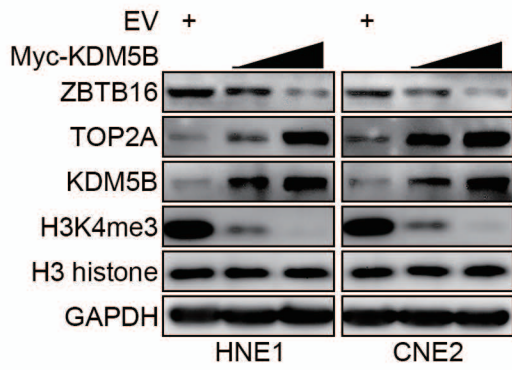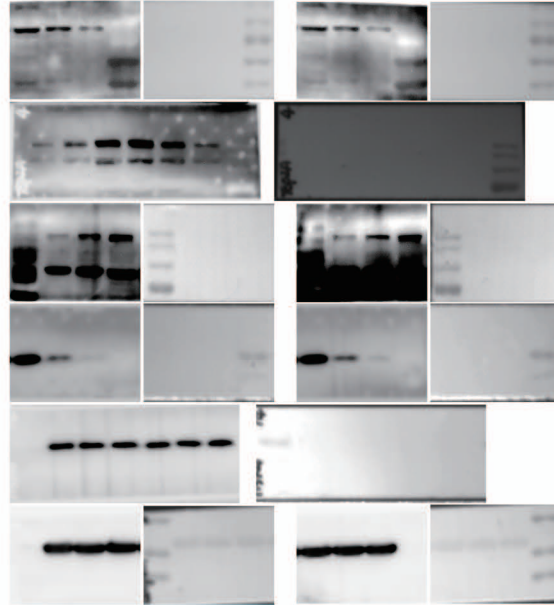

### Supplementary Figure 8 c

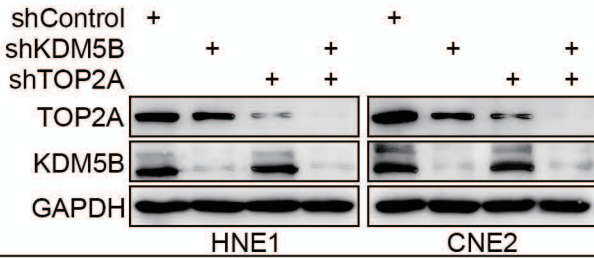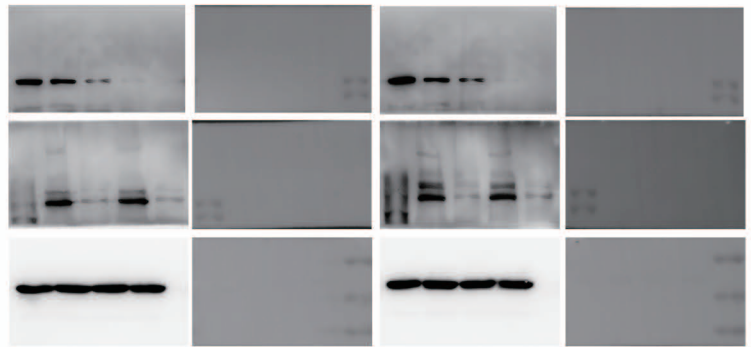

### Supplementary Figure 8 e

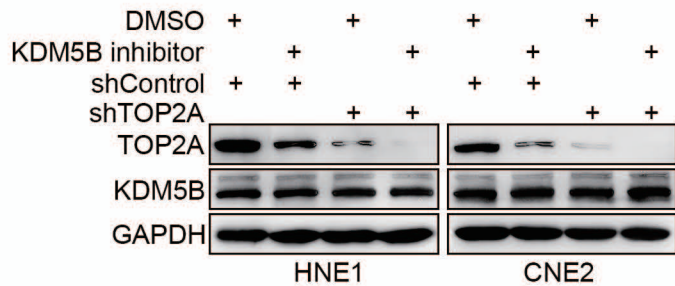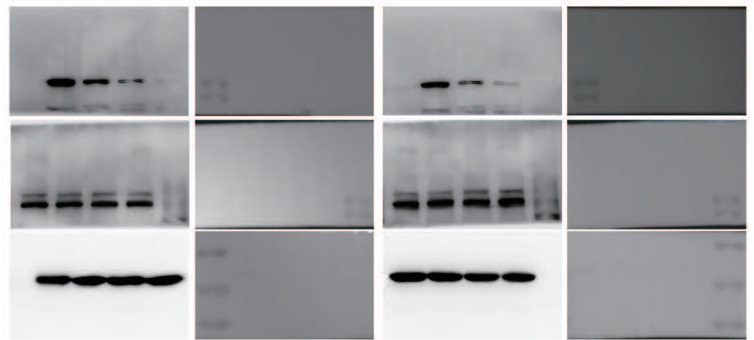

### Supplementary Figure 8 g

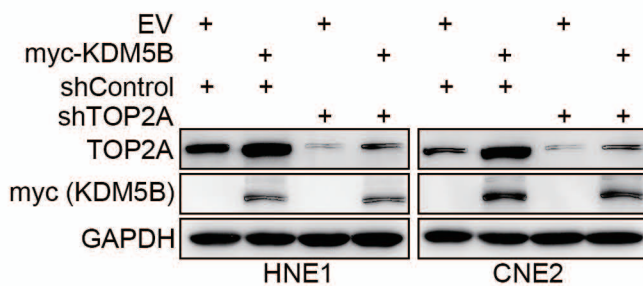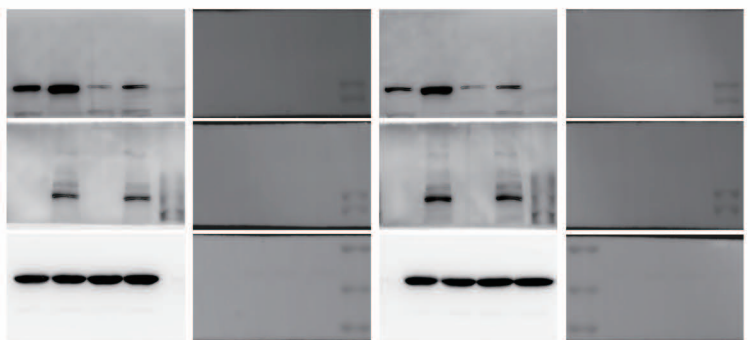

Supplement: 41418_2024_1257_MOESM2_ESM.pdf [file 41418_2024_1257_MOESM2_ESM.pdf]
