# Supplementary material for: Deubiquitinase USP7 stabilizes KDM5B and promotes tumor progression and cisplatin resistance in nasopharyngeal carcinoma through the ZBTB16/TOP2A axis
Source: PubMed Central journal article supplement (PMC10923876; doi:10.1038/s41418-024-01257-x), 2024-01-29
Supplement: 41418_2024_1257_MOESM1_ESM.pdf [file 41418_2024_1257_MOESM1_ESM.pdf]

## **Deubiquitinase USP7 stabilizes KDM5B and promotes tumor progression and cisplatin resistance in nasopharyngeal carcinoma through the ZBTB16/TOP2A axis**

Bin Zhang, Jie Li, Yijun Wang, Xixi Liu, Xiao Yang, Zhiyun Liao, Suke Deng, Yue Deng, Zhiyuan Zhou, Yu Tian, Wenwen Wei, Jingshu Meng, Yan Hu, Chao Wan, Zhanjie Zhang, Fang Huang, Lu Wen, Bian Wu, Yajie Sun, Yan Li, Kunyu Yang

### **Supplementary Material and Methods**

#### **Antibodies and reagents**

KDM5B (#A14104, ABclonal, 1:500 dilution), USP7 (#66514-1-Ig, Proteintech, 1:5000 dilution), GAPDH (#60004-1-Ig, Proteintech, 1:10000 dilution), ZBTB16 (#66672-1-Ig, Proteintech, 1:2000 dilution), TOP2A (#20233-1-AP, Proteintech, 1:10000 dilution), Flag-tag (#66008-4-Ig, Proteintech, 1:5000 dilution), H3K4me3 (#A22146, ABclonal, 1:10000 dilution), and HA-tag (#51064-2-AP, Proteintech, 1:5000 dilution) were employed for western blot analysis. KDM5B (#A14104, ABclonal, 1:500 dilution), and USP7 (#66514-1-Ig, Proteintech, 1:500 dilution) were used for the immunohistochemistry of tissue microarray (#HNasN132Su01). Cisplatin (#S1166), and MG132 (#S2619) were obtained from the Selleck (Shanghai, China). Tissue microarray slides (#HNasN132Su01) were purchased from Outdo Biotech, Shanghai, China. The method of scoring the staining intensity was described previously [1].

#### **Public datasets for data mining and bioinformatics analysis**

(1) **GSE118719:** Transcriptome data NPC tissues were obtained from the GEO database (<https://www.ncbi.nlm.nih.gov/>). Data from 7 NPC biopsy specimens and 4 normal nasopharyngeal mucosal specimens were acquired.

(2) **GSE53819:** Transcriptome data of NPC tissues were obtained from the GEO database (<https://www.ncbi.nlm.nih.gov/>). Data from 18 NPC tissues, 18 non-cancerous nasopharyngeal tissues and 2992 genes were acquired.

### **Western blot analysis and co-immunoprecipitation (co-IP)**

The collected cells were lysed with RIPA buffer (#G2002, servicebio, China), containing phosphatase inhibitors (#G2007, servicebio, China) and 1% protease inhibitors (#G2007, servicebio, China). Then the cell lysates were centrifuged at 12,000 rpm at 4 °C for 25 minutes and collected the supernatants. And 5 × loading buffer was added to the supernatants and boiled 10min in 100 °C water. The concentration of protein in cell lysates was detected by enhanced BCA protein analysis kit (#G2026, servicebio, China). The same amount of protein was loaded in each well of SDS-PAGE gels. The protein in the gels were transferred to the PVDF membranes. Then PVDF membranes were blocked with 5% non-fat milk at room temperature for 1 h and incubated with the primary antibody at 4 °C. The next day, the membranes were washed with 1 × TBST 3 times (10 minutes each time) and incubated with the second antibody for 1 h. Then the membranes were washed again and exposed in dark field using ECL detection reagents (#G2020, servicebio, China). For co-immunoprecipitation (IP), collected cells were added with 1mL RIPA protein lysate containing 1 % protease

inhibitors on ice for at least 30 min. The supernatant was collected and co-cultured with Protein A and G Agarose beads (#G1718, Santa Cruz, America) and primary antibodies or IgG for 24 h at 4 °C. Then, the beads were washed with NETN buffer 6 times, added with 50 uL sample loading buffer, and boiled for 15 mins. Then, these samples were subjected to western blotting analysis. The antibodies used as follows: KDM5B (#A14104, ABclonal, 1:200 dilution), USP7 (#66514-1-Ig, Proteintech, 1:500 dilution).

### **Plasmids and siRNA transfection and shRNA infection**

USP7, KDM5B, ZBTB16, and TOP2A were obtained from WZ Bioscience (Shandong, China) and GeneChem (Shanghai, China). Flag-USP7 was cloned into the CMV-MCS-3xFlag-SV40-neomycin vector by GENECEM (Shanghai, China). Myc-KDM5B was cloned into the pEnter vector by GENECEM (Shanghai, China). His-ZBTB16 was cloned into the pEnter vector with C-terminal Flag and His tag by WZ Bioscience (Shandong, China). HA-TOP2A was cloned into the pCMV-N-HA vector. pGEX-4T-1 vector was used to construct GST-tag plasmids. Short hairpin RNAs (shRNAs) were obtained from GeneChem (Shanghai, China), and the siRNA was purchased from RiboBio (Guangzhou, China). siRNA transfection was performed using Lipofectamine 2000 (Thermo Fisher Scientific, China), and 50 nM siRNAs were used. At least 48 hours later, cells were harvested and analyzed. The method of shRNA transfection was described previously <sup>[1]</sup>. The sequences of the shRNAs and siRNAs are provided in Supplementary Table S1.

### **Chromatin immunoprecipitation (ChIP) and ChIP-qRT-PCR**

For ChIP-qPCR, ChIP Assay Kit (#P2078, Beyotime, China) were used, following the protocol of the manufacturer's instructions. Immunoprecipitation was performed using the appropriate antibodies as follows: KDM5B (#15327, Cell Signaling Technology, 1:50 dilution), H3K4me3 (#9751, Cell Signaling Technology, 1:50 dilution), and ZBTB16 (#66672-1-Ig, Proteintech, 1:50 dilution) were used for ChIP assay. Mouse IgG antibody (#61656S, Cell Signaling Technology, 1:1000 dilution) and rabbit IgG antibody (#3900S, Cell Signaling Technology, 1:1000 dilution) were used as a negative control. The primers were designed according to the promoter sequences of the genes of interest. The sequences of the ChIP-qPCR primers are shown in Supplementary Table S3.

### ***In vitro* cell proliferation assay and CCK-8 assay**

Cell proliferation assay was performed following the manufacturer's instruction of the Cell Counting Kit-8 (CCK-8). Briefly,  $1 \times 10^3$  cells were seeded in 96-well plates and cultured with 100  $\mu$ L medium. 20  $\mu$ L of the CCK-8 reagent (#C0037, Beyotime) was added to each well one hour before the end of the incubation period following the manufacturer's instructions. The absorbance values at 450 nm were measured using a Multimode Plate Reader (EnSpire® 2300, USA). CCK-8 assay was applied to measure the half maximal inhibitory concentration ( $IC_{50}$ ) of cisplatin after treated with a serial dose of cisplatin for 24 h in HNE1 and CNE2 cells.

### **Cell invasion assay**

Transwell chambers (8.0  $\mu\text{m}$  Pore Size, CORNING) were used to assess the cell invasion ability. Cells were seeded into the Matrigel-coated invasion upper chamber with serum-free 1640 medium, and Medium containing 30% FBS was placed in the lower chambers and incubated for 18 hours in cell incubator. After incubation, the cells were fixed in methanol for 30 mins and then stained with Crystal Violet stain solution (#C0121, Beyotime). Invasion cells were evaluated under a microscope at five fields per well. All the experiments were repeated three times.

### **Colony formation assay**

In this study, cell proliferation was evaluated using the colony formation assay. Cells were seeded into 6-well plates (1000 cells per well) and cultured in the 1640 medium containing 10% FBS at 37 °C. After 2 weeks, the cells were fixed in methanol for 30 min, stained with Crystal Violet Staining Solution for 20 mins, and washed 3 times with 1  $\times$  PBS. The number of colonies was counted and recorded. All the experiments were repeated three times.

### **Transcriptome sequencing (RNA-seq)**

Total RNA was extracted by using TRIzol reagent (#R401-01 RNA isolater Total RNA Extraction Reagent, vazyme, Nanjing, China), and transcriptome sequencing was performed by NOVOGENE (Beijing, China) based on the Illumina platform. The library preparations were sequenced on an Illumina NovaSeq platform, and 150 bp

paired-end reads were generated. The RNA-seq data is provided in Supplementary Tables S4.

### **Statistical analysis**

Each assay was performed in at least three independent experiments. Data were presented as the mean  $\pm$  SD. GraphPad Prism 8 software was used to calculate the P value using Student's t-test for between-group comparisons and one-way ANOVA or two-way ANOVA for multiple comparisons. P value  $< 0.05$  was considered statistically significant. In all cases, the significance of differences was indicated as follows: \*P  $< 0.05$ ; \*\*P  $< 0.01$ ; \*\*\*P  $< 0.001$ ; not significant (ns), P  $> 0.05$ .

- [1] Zhang, B., Cheng, X., Zhan, S., Jin, X., & Liu, T. MIB1 upregulates IQGAP1 and promotes pancreatic cancer progression by inducing ST7 degradation. *Mol Oncol*, 15(11): 3062–3075. (2021)



Supplementary Figure 2

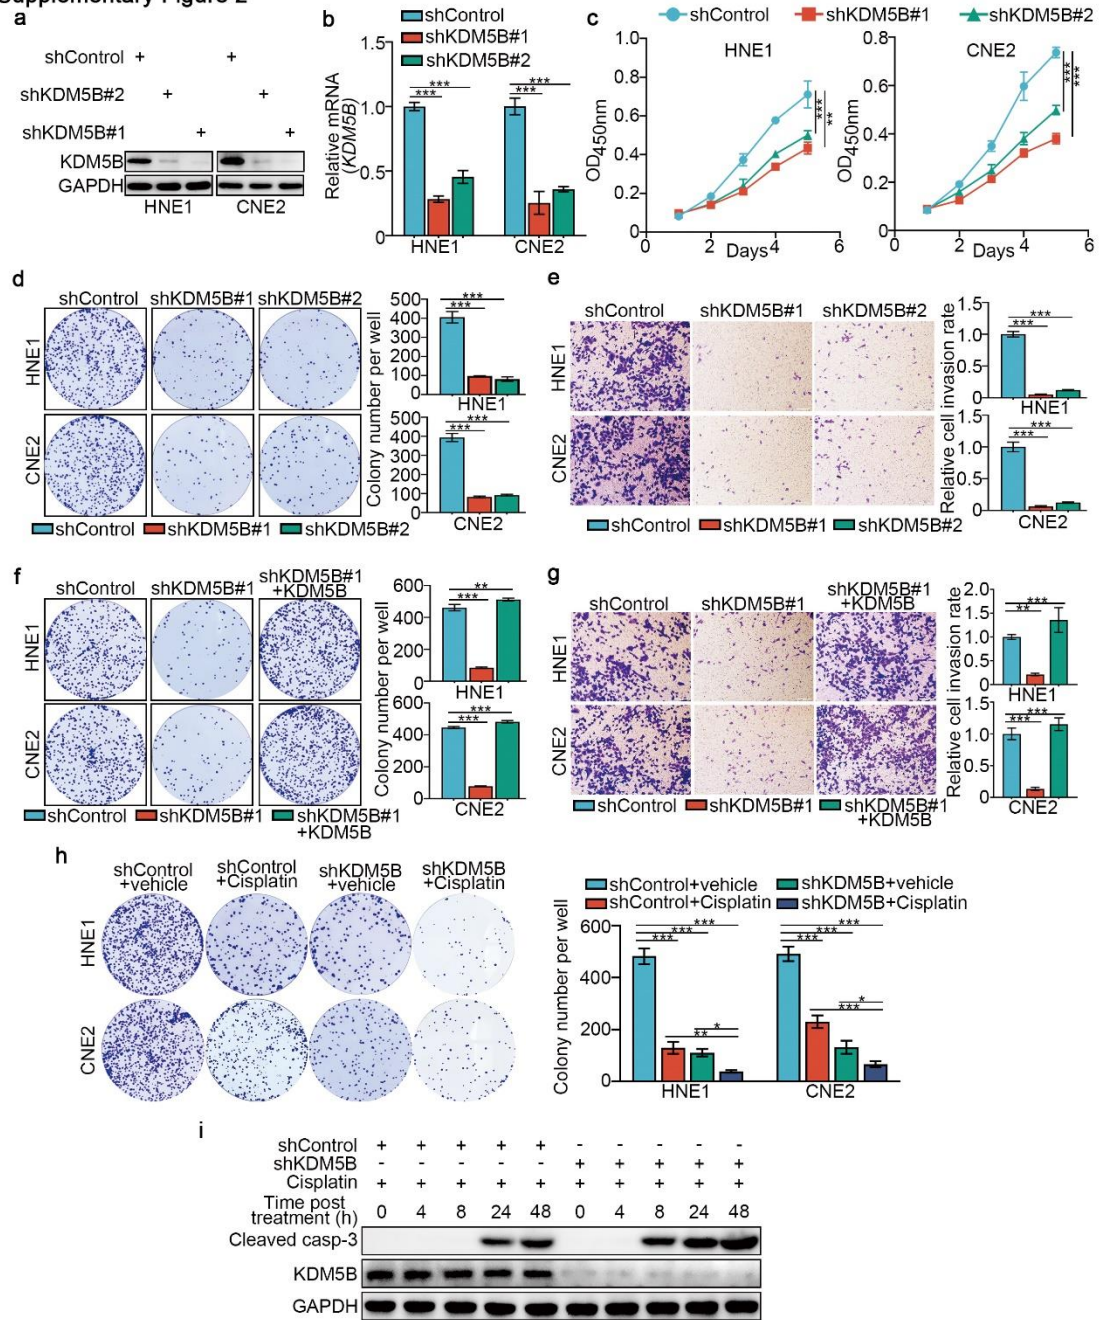

Supplementary figure 2. KDM5B promotes NPC cell proliferation and resistance to cisplatin.

**a-e** HNE1 and CNE2 cells infected with shControl, shKDM5B #1 or shKDM5B #2 for 48 h. Cells were harvested for Western blotting analysis (a), RT-qPCR analysis (b), CCK-8 assay (c), colony formation assay (d) and transwell assay (e). **f and g** HNE1



and CNE2 cells infected with shControl, shKDM5B or shKDM5B+myc-KDM5B for 48 h. Cells were harvested for colony formation assay (f) and transwell assay (e). **h** HNE1 and CNE2 cells were infected with shControl or shKDM5B plasmid for 48 hours. Then cells were treated with or without cisplatin (4  $\mu\text{g}/\text{ml}$ ) for another 48 hours. Cells were collected for colony formation assay. **i** Cells were treated with cisplatin for 0h, 4h, 8h, 24h, 48h. Cells were harvested for Western blotting analysis with indicated antibodies. Statistical significance was determined by one-way ANOVA followed by Tukey's multiple comparisons test. Data presented as Mean  $\pm$ SD with three replicates. \* $P < 0.05$ ; \*\* $P < 0.01$ ; \*\*\* $P < 0.001$ .

**Supplementary Figure 3**

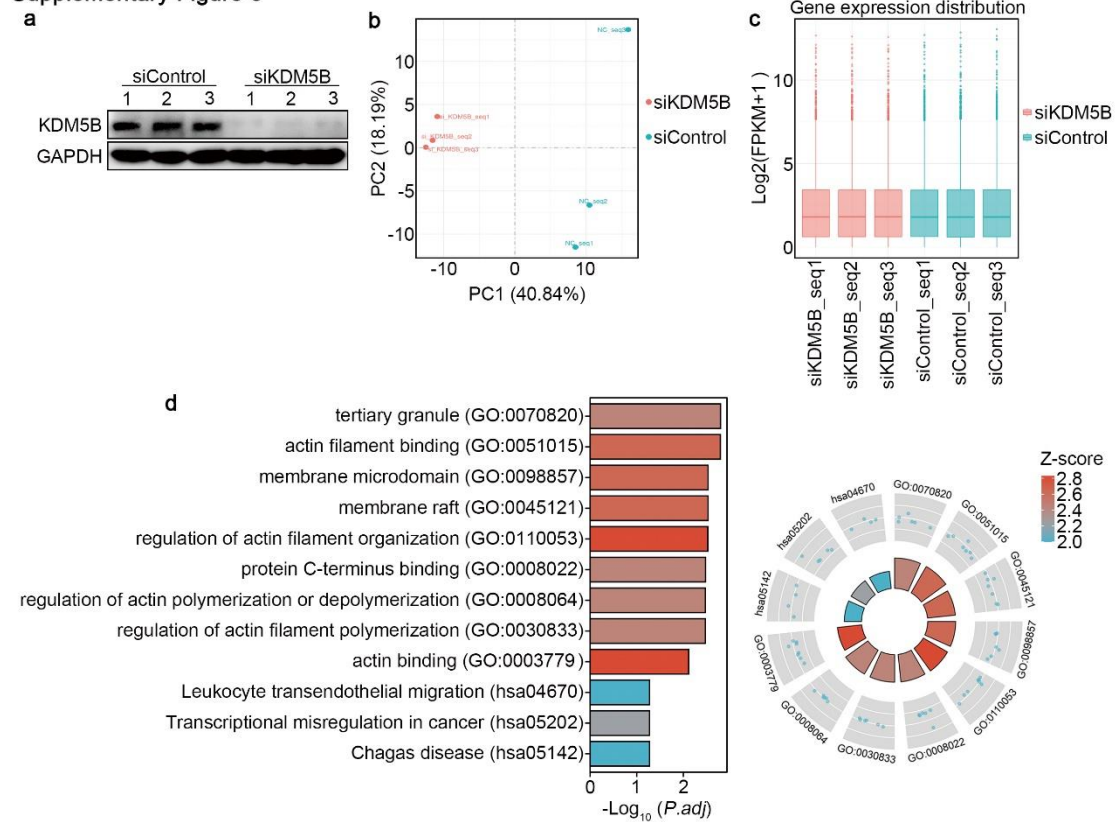

**Supplementary figure 3. a** HNE1 cells infected with siControl, siKDM5B for 48 h.

Cells were harvested for Western blotting analysis before RNA-seq analysis. **b-c**

Principle Component Analysis (b) and boxplot (c) to show the quality control of RNA sequencing. **d** The GO enrichment analysis of 61 candidate genes.

Supplementary Figure 4

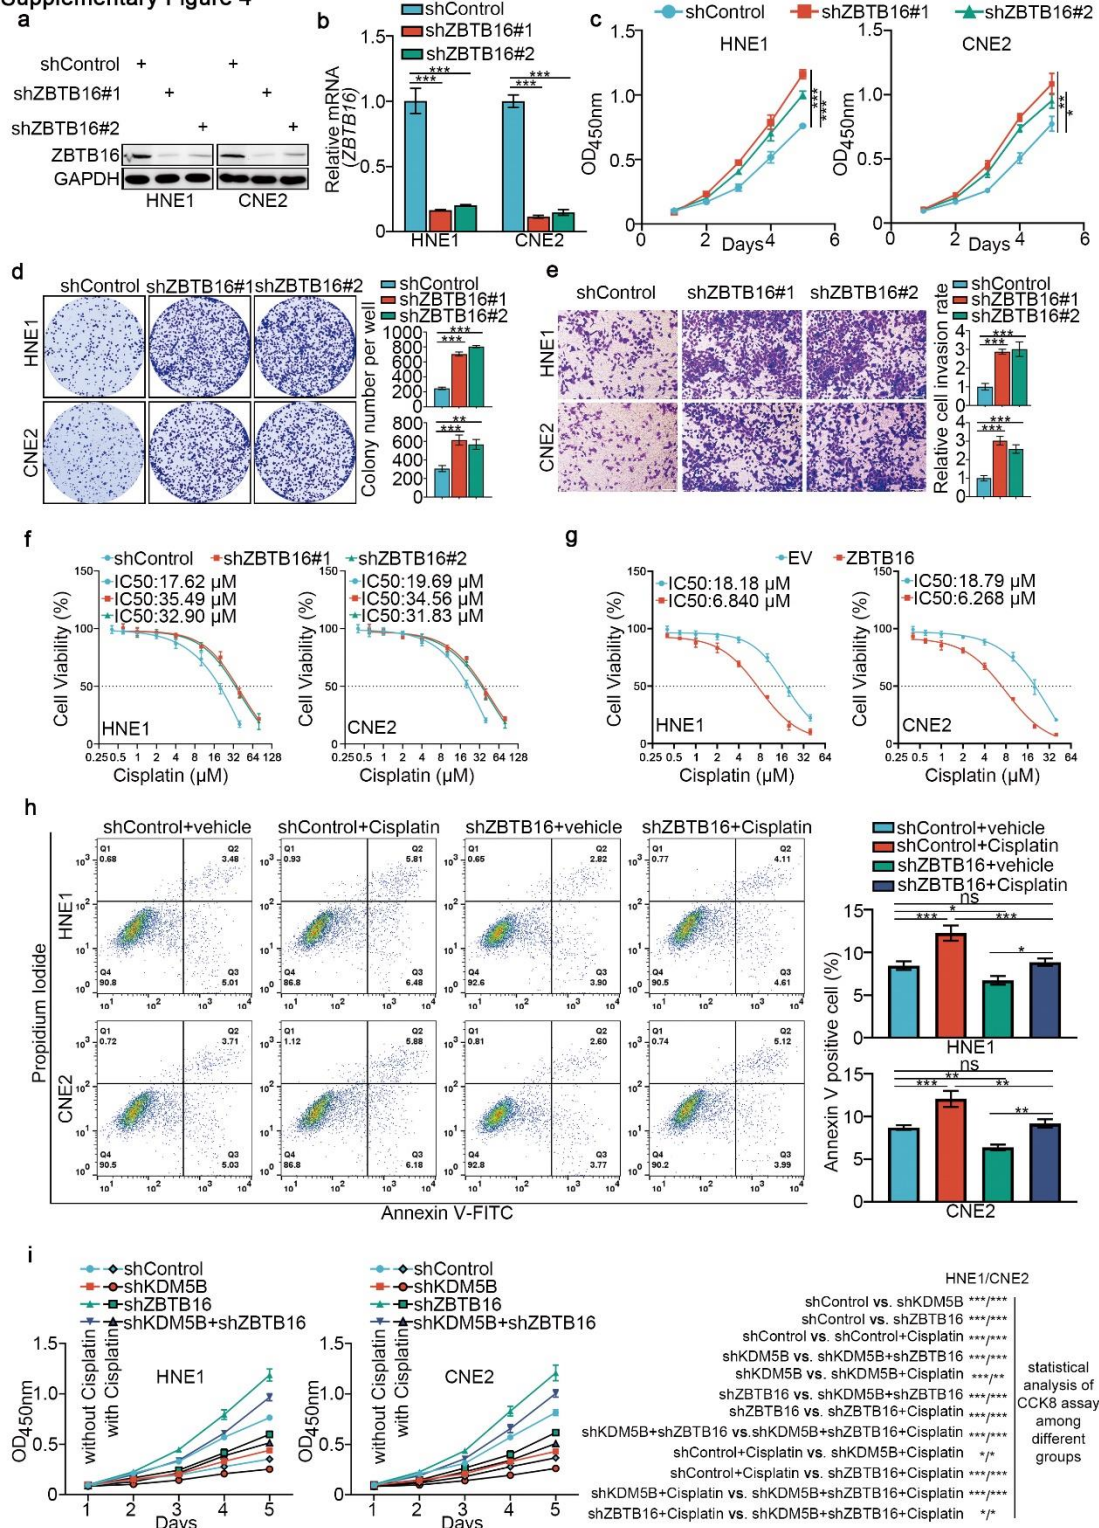

**Supplementary figure 4. ZBTB16 inhibits the progression and cisplatin resistance of NPC.**

**a-e** HNE1 and CNE2 cells infected with shControl, shZBTB16 #1 or shZBTB16 #2 for 48 h. Cells were harvested for Western blotting analysis (a), RT-qPCR analysis (b), CCK-8 assay (c), colony formation assay (d) and transwell assay (e). Statistical significance was determined by one-way ANOVA followed by Tukey's multiple comparisons test. Data presented as Mean  $\pm$ SD with three replicates. \*P<0.05; \*\*P<0.01; \*\*\*P<0.001. **f and g** HNE1 and CNE2 cells infected with shZBTB16 #1, shZBTB16 #2 or ZBTB16 plasmids for 72 h. Cells were treated with a serial dose of cisplatin. Then, these cells were collected for CCK-8 assay and subjected to measure the IC50 values of cisplatin. **h** HNE1 and CNE2 cells were infected with shControl or shZBTB16 plasmid for 48 hours. then cells were treated with or without cisplatin (4  $\mu$ g/ml) for another 48 hours. Cells were collected for fluorescein isothiocyanate (FITC)/PI flow cytometry. Statistical significance was determined by one-way ANOVA followed by Tukey's multiple comparisons test. Data presented as Mean  $\pm$ SD with three replicates. NS not significant; \*P<0.05; \*\*P<0.01; \*\*\*P<0.001. **i** HNE1 and CNE2 cells were infected with shControl, shKDM5B or shZBTB16 plasmid for 48 hours. Then cells were treated with or without cisplatin (4  $\mu$ g/ml) for another 48 hours. Cells were collected for colony formation assay. Statistical significance was determined by one-way ANOVA followed by Tukey's multiple comparisons test. Data presented as Mean  $\pm$ SD with three replicates. \*P<0.05; \*\*\*P<0.001.

Supplementary Figure 5

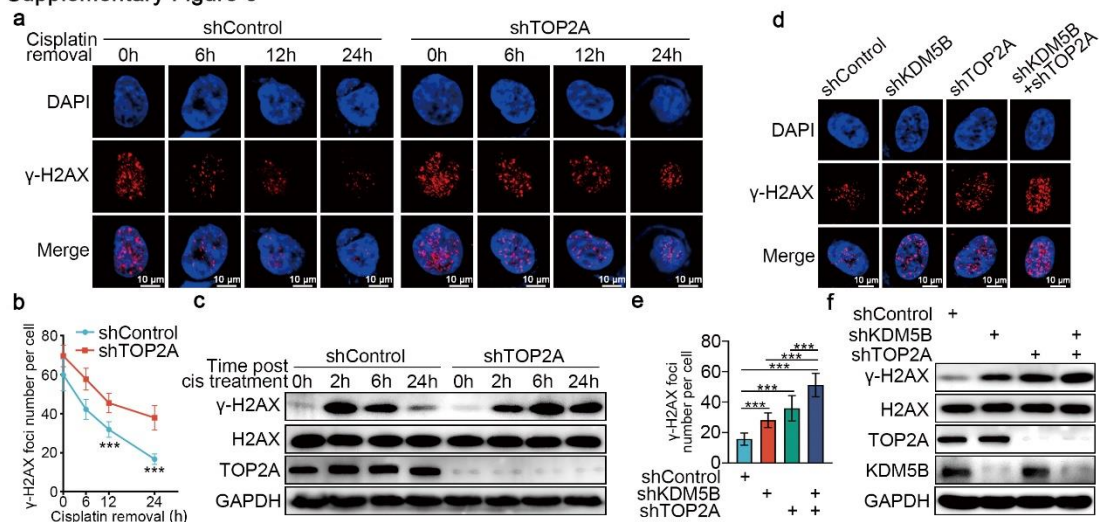

**Supplementary figure 5. KDM5B promotes the repair of cisplatin-induced DSBs**

**in NPC cells through TOP2A. a-b** After treating HNE1 cells with cisplatin (4  $\mu\text{g/ml}$ )

for 8 hours, the cisplatin was removed. Immunofluorescence (a) was performed in

HNE1 to detect  $\gamma\text{H2AX}$  foci after cisplatin removal for 0, 6, 12 and 24 hours. The

statistical graph of this  $\gamma\text{H2AX}$  foci assay(b). c HNE1 cells were harvested for Western

blotting analysis after cisplatin treatment for 0h, 2h, 6h, 24h. d-f HNE1 cells infected

with shControl, shKDM5B or shTOP2A for 48 h. Cells were harvested for Western

blotting analysis (f) and  $\gamma\text{H2AX}$  foci assay (d). The statistical graph of this  $\gamma\text{H2AX}$  foci

assay (e). Statistical significance was determined by one-way ANOVA followed by

Tukey's multiple comparisons test. Data presented as Mean  $\pm$ SD with three replicates.

\*\*\*P<0.001.



Supplementary Figure 6

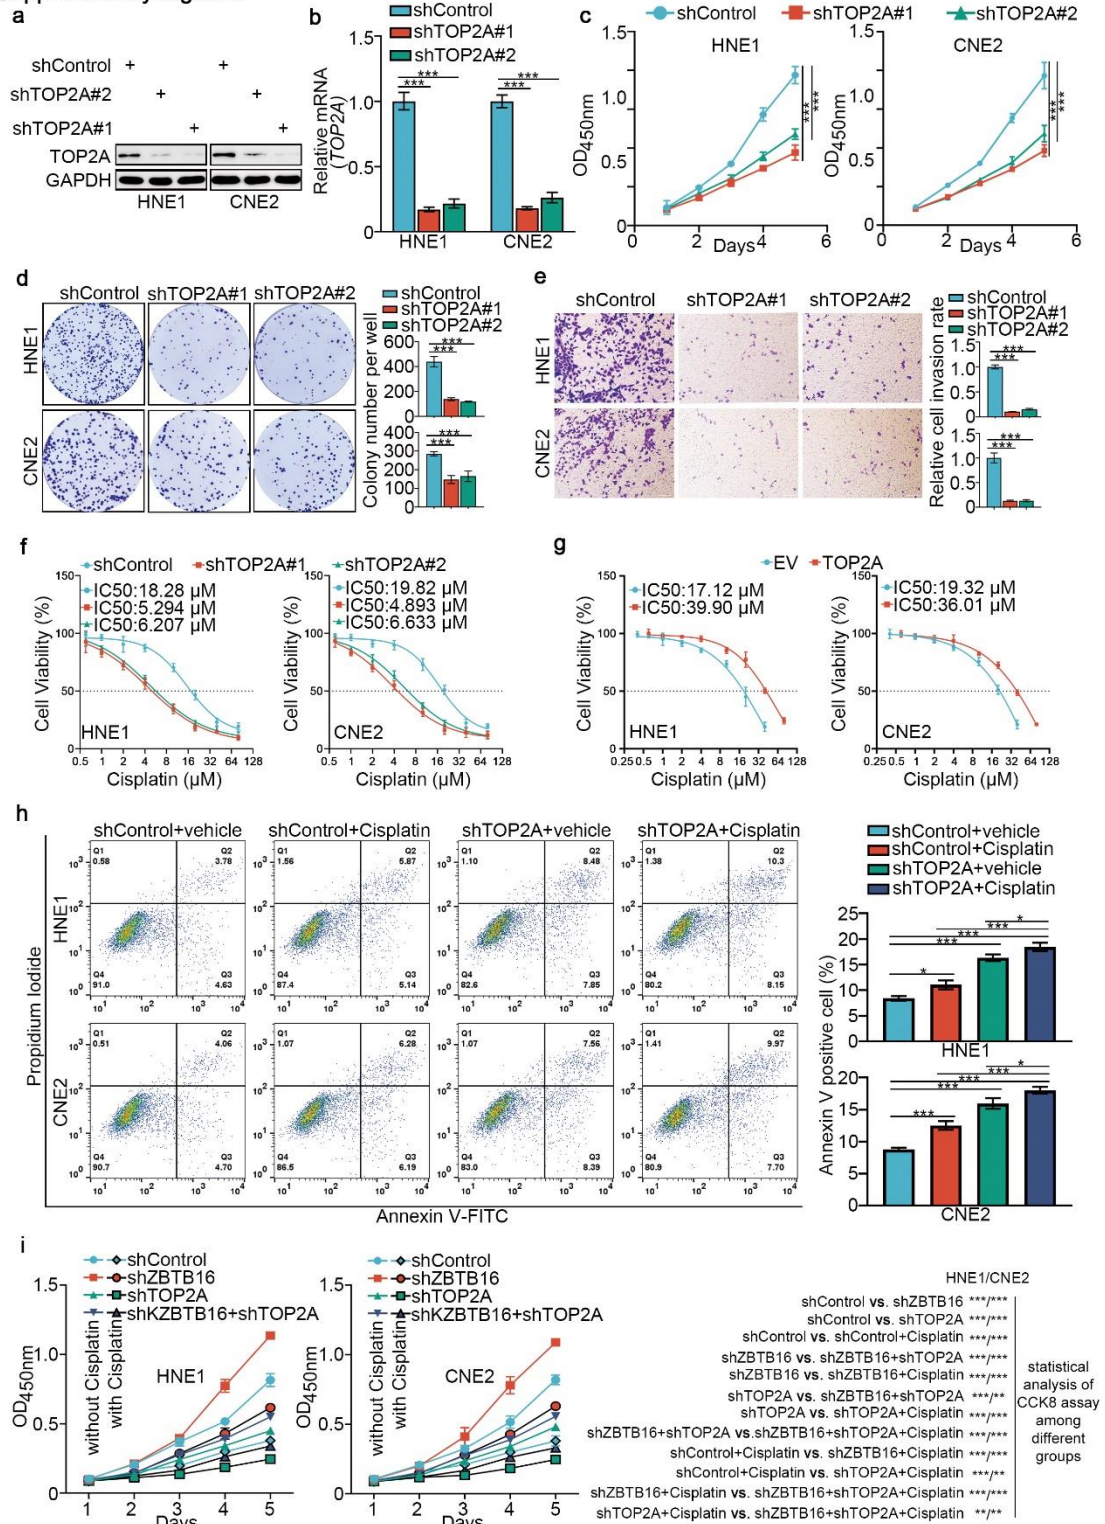

Supplementary figure 6. TOP2A promotes the progression and cisplatin resistance of NPC.

**a-e** HNE1 and CNE2 cells infected with shControl, shTOP2A #1 or shTOP2A #2 for 48 h. Cells were harvested for Western blotting analysis (a), RT-qPCR analysis (b), CCK-8 assay (c), colony formation assay (d) and transwell assay (e). Statistical significance was determined by one-way ANOVA followed by Tukey's multiple comparisons test. Data presented as Mean  $\pm$ SD with three replicates. \*\*\*P<0.001. **f and g** HNE1 and CNE2 cells infected with shTOP2A #1, shTOP2A #2 or TOP2A plasmids for 72 h. Cells were treated with a serial dose of cisplatin. Then, these cells were collected for CCK-8 assay and subjected to measure the IC50 values of cisplatin. **h** HNE1 and CNE2 cells were infected with shControl or shTOP2A plasmid for 48 hours. Then cells were treated with or without cisplatin (4  $\mu$ g/ml) for another 48 hours. Cells were collected for fluorescein isothiocyanate (FITC)/PI flow cytometry. Statistical significance was determined by one-way ANOVA followed by Tukey's multiple comparisons test. Data presented as Mean  $\pm$ SD with three replicates. NS not significant; \*P<0.05; \*\*\*P<0.001. **i** HNE1 and CNE2 cells were infected with shControl, shZBTB16 or shTOP2A plasmid for 48 hours. Then cells were treated with or without cisplatin (4  $\mu$ g/ml) for another 48 hours. Cells were collected for colony formation assay. Statistical significance was determined by one-way ANOVA followed by Tukey's multiple comparisons test. Data presented as Mean  $\pm$ SD with three replicates. \*\*P<0.01; \*\*\*P<0.001.

### Supplementary Figure 7

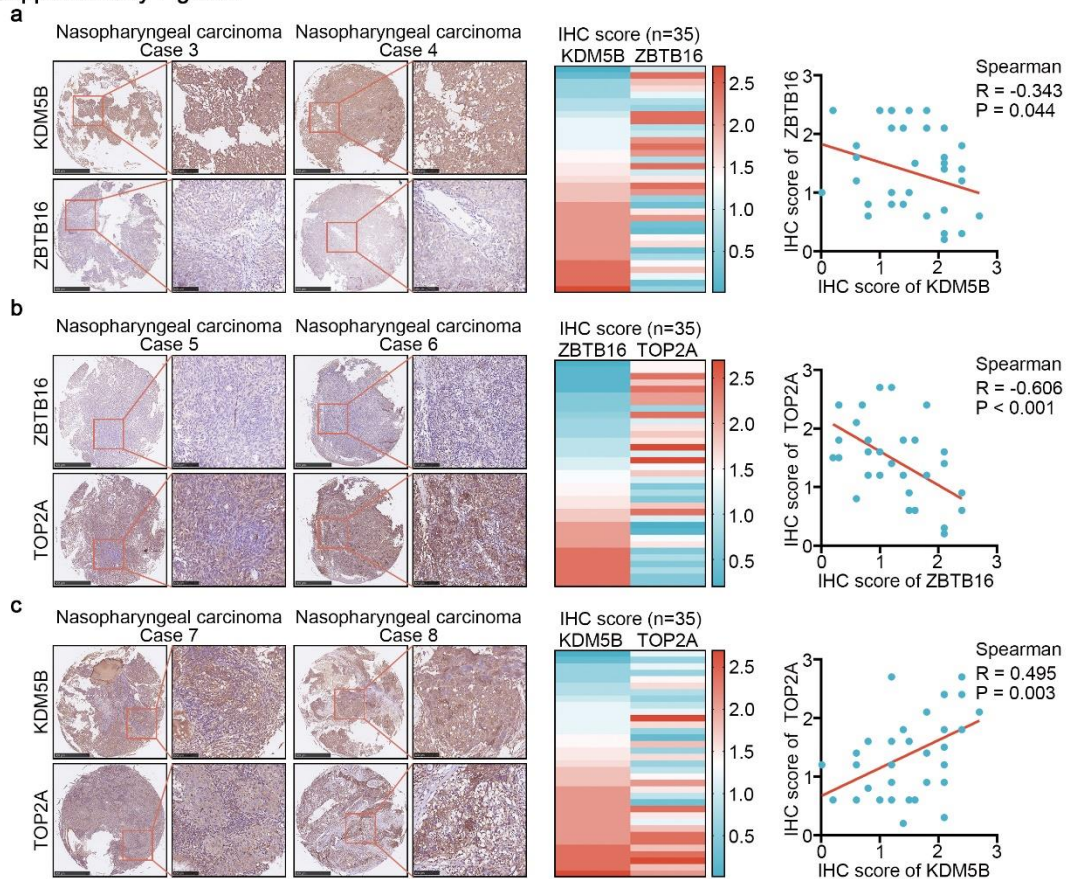

### Supplementary figure 7. The relationship among KDM5B, ZBTB16 and TOP2A at the protein level.

**a-c** The tissue microarrays of NPC were stained with KDM5B, ZBTB16 and TOP2A, respectively (n = 35). The typical IHC images stained with KDM5B, ZBTB16 and TOP2A are shown in panel. The size of the scale bar on microscopy images as indicated in the figure. The expression levels of KDM5B, ZBTB16 and TOP2A are shown in the heatmap. The correlation of these three proteins was shown in panel. Spearman correlation was used to determine statistical significance. The P value was indicated in the figure.

Supplementary Figure 8

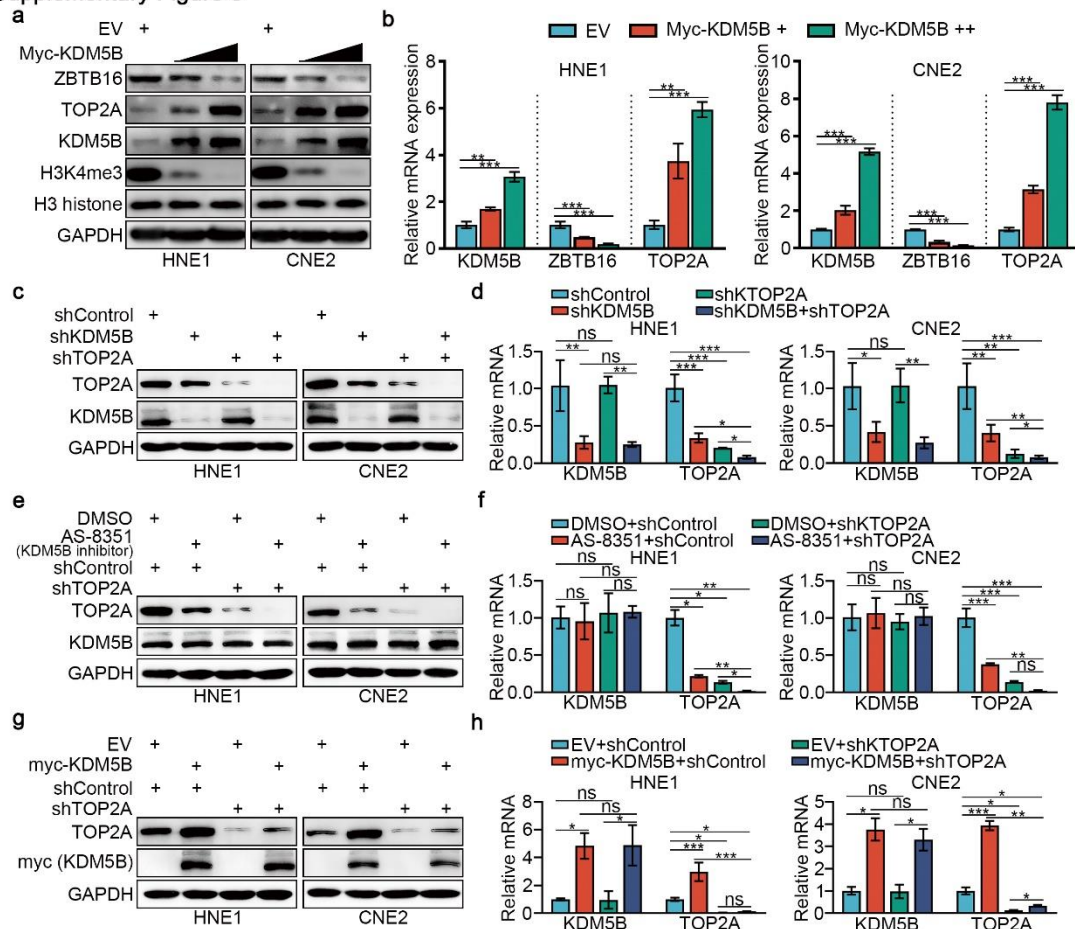

**Supplementary figure 8. TOP2A was the crucial downstream of KDM5B, related to Figure 5.**

**a and b** HNE1 and CNE2 cells were infected with indicated EV or Myc-KDM5B for 72 h. Cells were collected for Western blotting analysis (**a**), RT-qPCR analysis (**b**).

**c and d** HNE1 and CNE2 cells were infected with indicated shKDM5B or shTOP2A for 72 h. Cells were collected for Western blotting analysis (**c**), RT-qPCR analysis (**d**).

**e and f** HNE1 and CNE2 cells were infected with the indicated shTOP2A for 72 h. Cells were treated with or without KDM5B inhibitor AS-8351 (5  $\mu$ M) for 24 h and harvested for Western blotting analysis (**e**), RT-qPCR analysis (**f**).

**g and h** HNE1 and CNE2 cells were infected with shControl or shZBTB16 for 48 h. Then, cells were transfected with pcDNA3.1 or myc-KDM5B as indicated. After 24 h, cells were harvested for Western blotting analysis (**g**) and RT-qPCR analysis (**h**). Statistical significance was determined by one-way ANOVA followed by Tukey's multiple



comparisons test. Data presented as Mean  $\pm$  SD with three replicates. NS not significant; \* $P < 0.05$ ; \*\* $P < 0.01$ . \*\*\* $P < 0.001$ .

Supplementary Figure 9

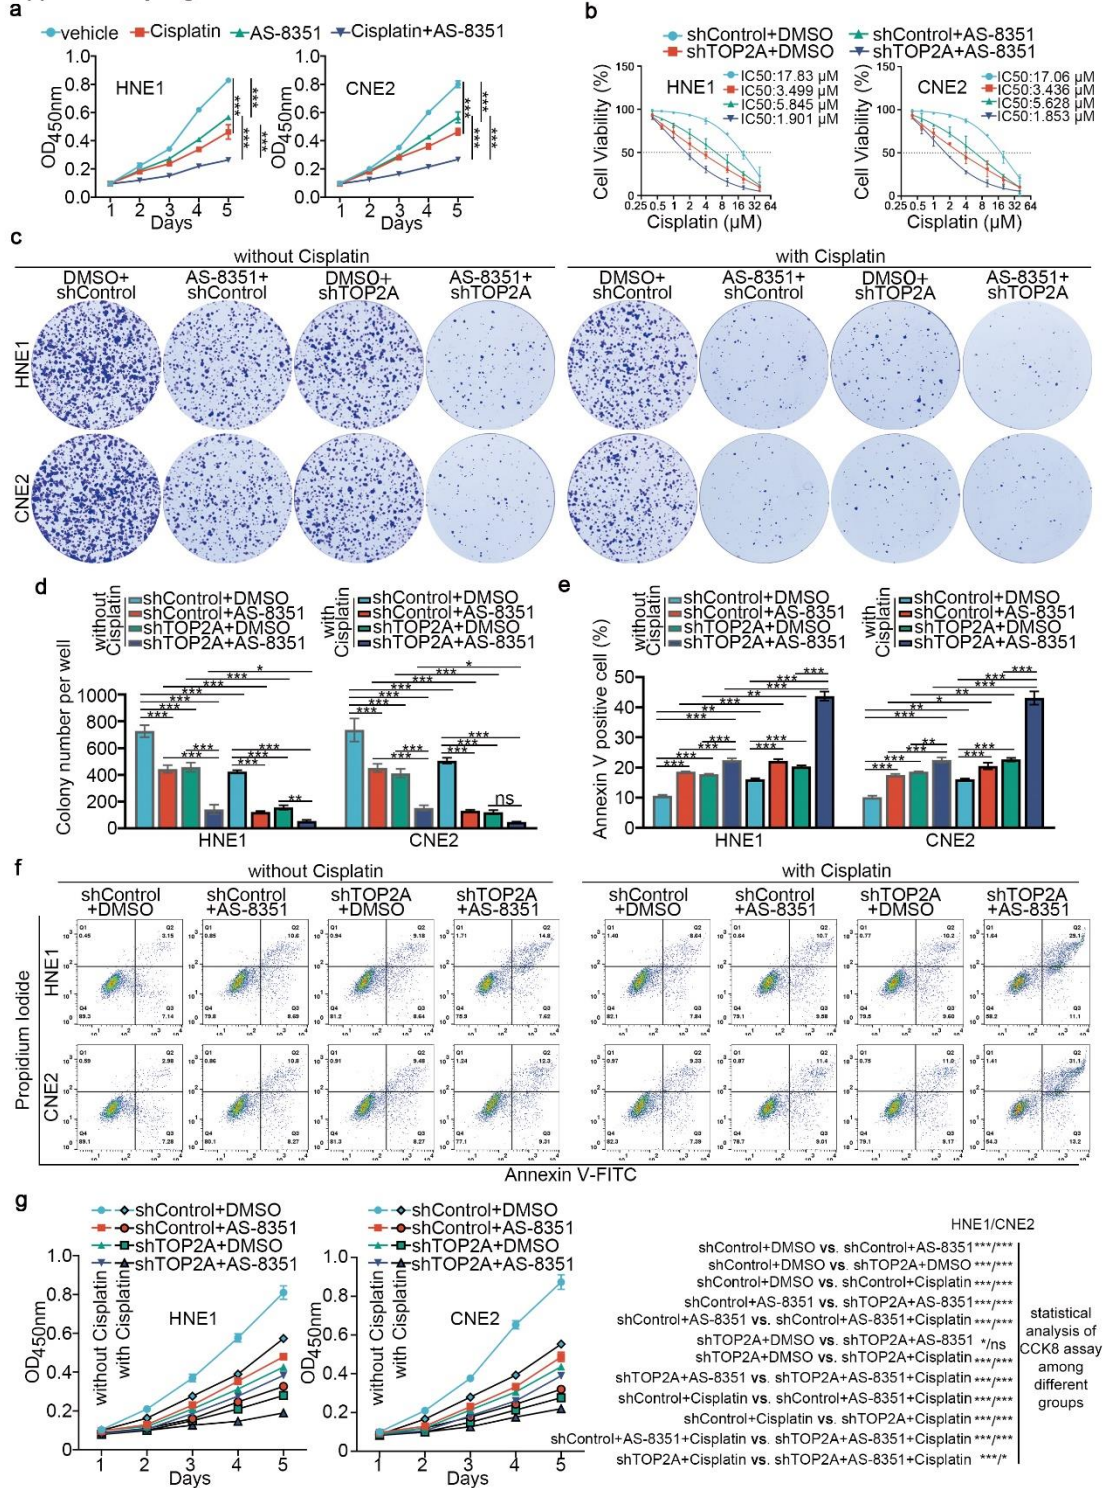

Supplementary figure 9. Targeting KDM5B and/or TOP2A can enhance the sensitivity of NPC cells to cisplatin.

**a** HNE1 and CNE2 cells were treated with or without KDM5B inhibitor AS-8351 (5  $\mu$ M) in the presence or absence of cisplatin for 24 hours. Cells were collected for CCK-8 assay. **b** HNE1 and CNE2 cells were infected with shControl or shTOP2A plasmid for 48 hours. Then cells were treated with or without KDM5B inhibitor AS-8351 (5  $\mu$ M) for 24 h in a serial dose of cisplatin. Then, these cells were collected for CCK-8 assay and subjected to measure the  $IC_{50}$  values of cisplatin. **c and d** HNE1 and CNE2 cells were infected with shControl or shTOP2A plasmid for 48 hours. Then cells were treated with or without KDM5B inhibitor AS-8351 (5  $\mu$ M) for colony formation assay in the presence or absence of cisplatin. **e-g** HNE1 and CNE2 cells were infected with shControl or shTOP2A plasmid for 48 hours. Then cells were treated with or without KDM5B inhibitor AS-8351 (5  $\mu$ M) for fluorescein isothiocyanate (FITC)/PI flow cytometry (e and f) and CCK-8 assay (g) in the presence or absence of cisplatin. Statistical significance was determined by one-way ANOVA followed by Tukey's multiple comparisons test. Data presented as Mean  $\pm$ SD with three replicates. NS not significant; \* $P < 0.05$ ; \*\* $P < 0.01$ ; \*\*\* $P < 0.001$ .

Supplementary Figure 10

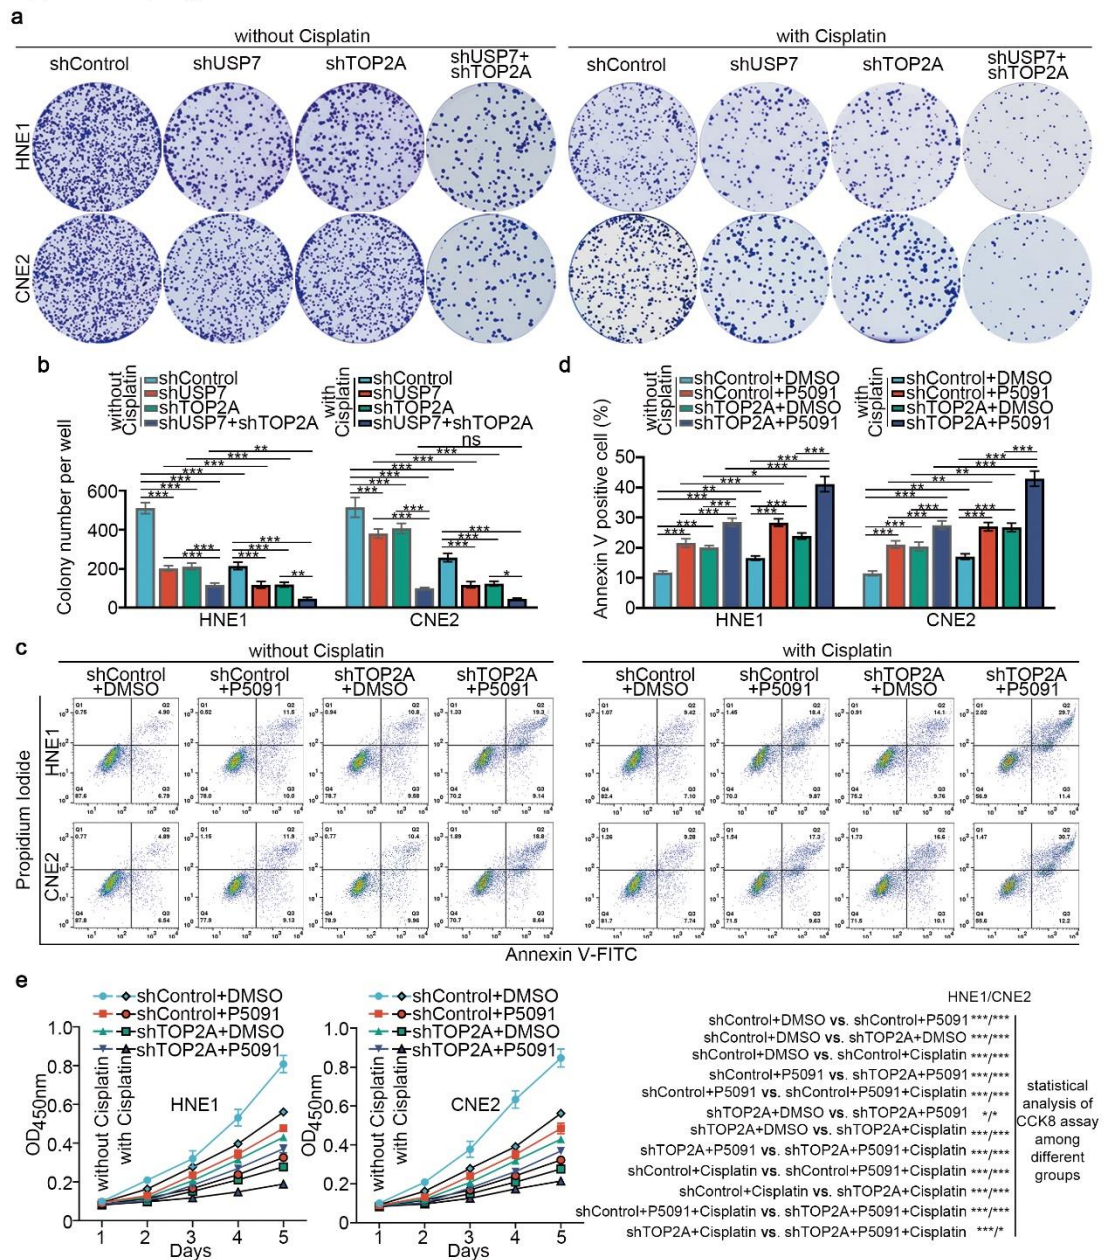

Supplementary figure 10. Targeting USP7 and/or TOP2A can enhance the sensitivity of NPC cells to cisplatin.

**a and b** HNE1 and CNE2 cells were infected with shUSP7 or shTOP2A plasmid for 48 hours. Then cells were treated with USP7 inhibitors P5091 (10  $\mu$ M) for colony formation assay in the presence or absence of cisplatin. **c-e** HNE1 and CNE2 cells were infected with shControl or shTOP2A plasmid for 48 hours. Then cells were treated with

USP7 inhibitors P5091 (10  $\mu$ M) for fluorescein isothiocyanate (FITC)/PI flow cytometry (c and d) and CCK-8 assay (e) in the presence or absence of cisplatin. Statistical significance was determined by one-way ANOVA followed by Tukey's multiple comparisons test. Data presented as Mean  $\pm$ SD with three replicates. \*P<0.05; \*\*P<0.01; \*\*\*P<0.001.

**Table S1. Sequences for shRNAs and siRNAs**

**Sequences for shRNAs:**

|            |                                                                   |
|------------|-------------------------------------------------------------------|
| shUSP7-1   | 5'-CCGGCCTGGATTTGTGGTTACGTTACTCGAGTAACGTAACCACAAATCCAGGTTTTTTG-3' |
| shUSP7-2   | 5'-CCGGCCAGCTAAGTATCAAAGGAACTCGAGTTTCCTTTGATACTTAGCTGGTTTTTTG-3'  |
| shKDM5B-1  | 5'-CCGGGCTCCCTTACTTTAGATGATACTCGAGTATCATCTAAAGTAAGGGAGCTTTTTTG-3' |
| shKDM5B-2  | 5'-CCGGCCTGAGGAAGAGGAGTATCTTCTCGAGAAGATACTCCTCTCCTCAGGTTTTTTG-3'  |
| shZBTB16-1 | 5'-CCGGGAATGCACTTACTGGCTCATTCTCGAGAATGAGCCAGTAAGTGCATTCTTTTTG-3'  |
| shZBTB16-2 | 5'-CCGGGTGGACAGTTTGATGACCATACTCGAGTATGGTCATCAAAGTCCACTTTTTG-3'    |
| shTOP2A-1  | 5'-CCGGGCCTGATTTGTCTAAGTTAACTCGAGTTAACTTAGACAAATCAGGCTTTTTG-3'    |
| shTOP2A-2  | 5'-CCGGGCTCCAAATCAATATGTGATTCTCGAGAATCACATATTGATTGGAGCTTTTTG-3'   |

**Sequences for siRNAs:**

|           |                           |
|-----------|---------------------------|
| siKDM5B#1 | 5'-GGAAGATCTTGGACTTATT-3' |
| siKDM5B#2 | 5'-GCAGAATCTTACAACGAAT-3' |

**Table S2. Sequences for primers used for RT-qPCR**

| Species | Gene          | Forward (5'-3')       | Reverse (5'-3')       |
|---------|---------------|-----------------------|-----------------------|
| Human   | <i>GAPDH</i>  | CCAGAACATCATCCCTGCCT  | CCTGCTTCACCACCTTCTTG  |
| Human   | <i>KDM5B</i>  | AGTGGGCTCACATATCAGAGG | CAAACACCTTAGGCTGTCTCC |
| Human   | <i>USP7</i>   | GGAAGCGGGAGATACAGATGA | AAGGACCGACTCACTCAGTCT |
| Human   | <i>ZBTB16</i> | CCTCAGACGACAATGACACGG | CTCGCTGGAATGCTTCGAGAT |

|       |              |                       |                       |
|-------|--------------|-----------------------|-----------------------|
| Human | <i>TOP2A</i> | ACCATTGCAGCCTGTAAATGA | GGGCGGAGCAAAATATGTTCC |
|-------|--------------|-----------------------|-----------------------|

**Table S3. Sequences of ChIP-qPCR primers**

| Species | Gene                        | Forward (5'-3')      | Reverse (5'-3')      |
|---------|-----------------------------|----------------------|----------------------|
| Human   | <i>ZBTB16</i><br>(Primer I) | CCGCCAGCACTAAAGATGGA | TTCGCAGTACCCGCTCTCAT |
| Human   | <i>ZBTB16</i><br>(Primer O) | ATTGCTAAAACCGCGTGACC | CTGGAGCTGAGCGAAGGTAG |
| Human   | <i>TOP2A</i><br>(Primer I)  | TGACACTTCCATGGTGACGG | GAGTCAGGGATTGGCTGGTC |
| Human   | <i>TOP2A</i><br>(Primer O)  | TTCAGGTCCCAGTAGAGCA  | TCACGGAGGTGAGCAAAAGT |

**Table S4. RNA-seq of siKDM5B vs. siControl**

| gene_id         | si_KDM5B    | si_Control  | log2FC       | pvalue    | padj      | gene_name | gene_biotype   |
|-----------------|-------------|-------------|--------------|-----------|-----------|-----------|----------------|
| ENSG00000058085 | 2679.55434  | 9772.149045 | -1.866737584 | 1.19E-307 | 1.96E-303 | LAMC2     | protein_coding |
| ENSG00000167601 | 681.2737036 | 4129.127151 | -2.599128127 | 2.56E-273 | 2.10E-269 | AXL       | protein_coding |
| ENSG00000106366 | 6983.17104  | 21016.13117 | -1.589521466 | 9.96E-243 | 5.45E-239 | SERPINE1  | protein_coding |
| ENSG00000096060 | 7470.809034 | 2640.028489 | 1.500693089  | 6.88E-168 | 2.83E-164 | FKBP5     | protein_coding |
| ENSG00000163283 | 6800.931609 | 2143.946576 | 1.665220323  | 4.62E-160 | 1.52E-156 | ALPP      | protein_coding |
| ENSG00000117139 | 411.6851235 | 2059.944744 | -2.323656446 | 7.72E-160 | 2.11E-156 | KDM5B     | protein_coding |
| ENSG00000180447 | 1403.320653 | 198.23233   | 2.822257218  | 1.22E-154 | 2.85E-151 | GAS1      | protein_coding |
| ENSG00000089597 | 13588.63246 | 5075.218323 | 1.420730353  | 3.64E-147 | 7.47E-144 | GANAB     | protein_coding |
| ENSG00000214049 | 2004.807653 | 5596.389585 | -1.48130113  | 2.25E-145 | 4.11E-142 | UCA1      | lincRNA        |
| ENSG00000166741 | 2261.14142  | 553.7556844 | 2.029594898  | 1.49E-144 | 2.45E-141 | NNMT      | protein_coding |
| ENSG00000189221 | 2649.238184 | 715.2175459 | 1.889673305  | 5.78E-140 | 8.63E-137 | MAOA      | protein_coding |
| ENSG00000197632 | 1036.362619 | 3160.38622  | -1.608969939 | 9.16E-132 | 1.25E-128 | SERPINB2  | protein_coding |
| ENSG00000167460 | 10318.22087 | 4648.114179 | 1.150444872  | 1.59E-125 | 2.01E-122 | TPM4      | protein_coding |
| ENSG00000186081 | 13231.24987 | 4161.946341 | 1.66844889   | 1.54E-119 | 1.80E-116 | KRT5      | protein_coding |
| ENSG00000111335 | 5708.492306 | 2276.43418  | 1.326408069  | 2.41E-116 | 2.64E-113 | OAS2      | protein_coding |
| ENSG00000117525 | 3520.237115 | 8482.858138 | -1.268931703 | 6.54E-116 | 6.71E-113 | F3        | protein_coding |
| ENSG00000138757 | 570.5225915 | 1922.251969 | -1.753129975 | 4.40E-109 | 4.25E-106 | G3BP2     | protein_coding |
| ENSG00000152377 | 256.5365797 | 1195.058724 | -2.219733763 | 1.57E-103 | 1.44E-100 | SPOCK1    | protein_coding |
| ENSG00000125538 | 723.2887286 | 2247.501751 | -1.635423418 | 1.06E-102 | 9.15E-100 | IL1B      | protein_coding |
| ENSG00000139289 | 1420.785198 | 3523.457283 | -1.31040219  | 2.17E-101 | 1.78E-98  | PHLDA1    | protein_coding |
| ENSG00000139211 | 4680.897277 | 9760.010386 | -1.060016731 | 7.63E-96  | 5.97E-93  | AMIGO2    | protein_coding |
| ENSG00000100605 | 962.3860155 | 2621.758556 | -1.446115395 | 6.15E-94  | 4.59E-91  | ITPK1     | protein_coding |
| ENSG00000104327 | 349.6041352 | 1290.086694 | -1.883764699 | 1.75E-91  | 1.25E-88  | CALB1     | protein_coding |
| ENSG00000130589 | 10640.38722 | 4370.958546 | 1.283399868  | 2.38E-90  | 1.63E-87  | HELZ2     | protein_coding |
| ENSG00000131238 | 1392.041218 | 3436.231566 | -1.303561848 | 2.32E-86  | 1.53E-83  | PPT1      | protein_coding |



|                 |             |             |              |          |          |           |                      |
|-----------------|-------------|-------------|--------------|----------|----------|-----------|----------------------|
| ENSG00000114942 | 2201.639865 | 4829.608231 | -1.133444204 | 2.95E-85 | 1.87E-82 | EEF1B2    | protein_coding       |
| ENSG00000183486 | 2530.817142 | 1002.410905 | 1.336373901  | 8.26E-85 | 5.02E-82 | MX2       | protein_coding       |
| ENSG00000113083 | 5771.99352  | 2752.720833 | 1.068315747  | 1.96E-84 | 1.15E-81 | LOX       | protein_coding       |
| ENSG00000111319 | 6494.626549 | 3241.396524 | 1.002617053  | 1.56E-81 | 8.54E-79 | SCNN1A    | protein_coding       |
| ENSG00000185745 | 2654.080041 | 1096.187156 | 1.27567072   | 9.56E-80 | 5.07E-77 | IFIT1     | protein_coding       |
| ENSG00000204103 | 872.4322755 | 183.0472189 | 2.252530188  | 1.56E-78 | 8.00E-76 | MAFB      | protein_coding       |
| ENSG00000149948 | 1576.506613 | 3784.014091 | -1.263416369 | 2.60E-78 | 1.30E-75 | HMGGA2    | protein_coding       |
| ENSG00000130635 | 17505.4063  | 8362.601741 | 1.065714329  | 1.03E-76 | 5.00E-74 | COL5A1    | protein_coding       |
| ENSG00000185499 | 1833.741768 | 627.7411155 | 1.545992479  | 1.25E-76 | 5.88E-74 | MUC1      | protein_coding       |
| ENSG00000173210 | 2826.26145  | 1271.657031 | 1.152395384  | 4.88E-74 | 2.23E-71 | ABLIM3    | protein_coding       |
| ENSG00000137959 | 4064.875443 | 1824.778271 | 1.155765272  | 2.18E-68 | 9.42E-66 | IFI44L    | protein_coding       |
| ENSG00000090054 | 947.2518678 | 2316.269044 | -1.289668964 | 3.58E-68 | 1.51E-65 | SPTLC1    | protein_coding       |
| ENSG00000078018 | 1447.815711 | 402.0672621 | 1.849024431  | 4.49E-68 | 1.84E-65 | MAP2      | protein_coding       |
| ENSG00000165949 | 9788.917494 | 4536.916904 | 1.109292747  | 6.06E-64 | 2.26E-61 | IFI27     | protein_coding       |
| ENSG00000091409 | 2334.386296 | 4740.498118 | -1.021911013 | 2.71E-63 | 9.90E-61 | ITGA6     | protein_coding       |
| ENSG00000111913 | 443.531722  | 57.59083617 | 2.942751478  | 1.14E-62 | 4.07E-60 | RIPOR2    | protein_coding       |
| ENSG00000130303 | 5603.366743 | 2498.782206 | 1.164857664  | 4.27E-62 | 1.46E-59 | BST2      | protein_coding       |
| ENSG00000132274 | 1907.382564 | 752.5714618 | 1.341818249  | 2.79E-60 | 9.36E-58 | TRIM22    | protein_coding       |
| ENSG00000138772 | 1369.236227 | 2991.230509 | -1.127407221 | 4.04E-58 | 1.25E-55 | ANXA3     | protein_coding       |
| ENSG00000153815 | 910.0946063 | 1994.871374 | -1.132222572 | 1.26E-57 | 3.84E-55 | CMIP      | protein_coding       |
| ENSG00000143537 | 4783.024834 | 2248.1071   | 1.088984722  | 1.75E-56 | 5.22E-54 | ADAM15    | protein_coding       |
| ENSG00000158417 | 1305.709778 | 2674.495195 | -1.03453045  | 1.13E-53 | 3.27E-51 | EIF5B     | protein_coding       |
| ENSG00000273749 | 974.3228056 | 2101.669977 | -1.108453603 | 8.51E-50 | 2.37E-47 | CYFIP1    | protein_coding       |
| ENSG00000118985 | 1147.777972 | 2478.257675 | -1.110149824 | 1.85E-49 | 5.06E-47 | ELL2      | protein_coding       |
| ENSG00000094975 | 564.5550005 | 1414.859575 | -1.324825826 | 4.64E-49 | 1.25E-46 | SUCO      | protein_coding       |
| ENSG00000089127 | 2329.941322 | 1128.774528 | 1.045290757  | 1.32E-48 | 3.50E-46 | OAS1      | protein_coding       |
| ENSG00000261780 | 347.7475716 | 954.4389765 | -1.456442199 | 7.21E-48 | 1.82E-45 | LINC02582 | processed_transcript |
| ENSG00000196611 | 49.7537855  | 323.5479884 | -2.699594617 | 1.48E-47 | 3.58E-45 | MMP1      | protein_coding       |
| ENSG00000175348 | 911.5138304 | 1992.603316 | -1.128058732 | 6.03E-46 | 1.44E-43 | TMEM9B    | protein_coding       |
| ENSG00000154188 | 345.0740905 | 49.39731445 | 2.8015353    | 4.91E-45 | 1.15E-42 | ANGPT1    | protein_coding       |
| ENSG00000049192 | 47.57795902 | 346.7447107 | -2.870065665 | 2.28E-44 | 5.13E-42 | ADAMTS6   | protein_coding       |
| ENSG00000070950 | 448.5692384 | 1250.319216 | -1.479175179 | 5.85E-44 | 1.26E-41 | RAD18     | protein_coding       |
| ENSG00000151414 | 801.0698505 | 1727.126483 | -1.108605933 | 1.81E-43 | 3.77E-41 | NEK7      | protein_coding       |
| ENSG00000134954 | 1684.375203 | 3473.943079 | -1.044063459 | 2.27E-43 | 4.63E-41 | ETS1      | protein_coding       |
| ENSG00000102996 | 865.9845418 | 334.9119672 | 1.370654235  | 1.70E-42 | 3.40E-40 | MMP15     | protein_coding       |
| ENSG00000164171 | 1156.503389 | 2552.908978 | -1.142238292 | 1.32E-41 | 2.61E-39 | ITGA2     | protein_coding       |
| ENSG00000058091 | 1010.206703 | 429.7641582 | 1.232696125  | 2.75E-40 | 5.13E-38 | CDK14     | protein_coding       |
| ENSG00000196072 | 284.7206144 | 738.4655161 | -1.375508768 | 5.84E-40 | 1.07E-37 | BLOC1S2   | protein_coding       |
| ENSG00000157693 | 529.5646824 | 1209.423642 | -1.190326278 | 1.37E-39 | 2.42E-37 | TMEM268   | protein_coding       |
| ENSG00000165806 | 936.3724954 | 368.006959  | 1.346871446  | 2.00E-39 | 3.45E-37 | CASP7     | protein_coding       |
| ENSG00000150630 | 599.7218874 | 1268.112203 | -1.079891369 | 4.17E-39 | 7.13E-37 | VEGFC     | protein_coding       |
| ENSG00000126709 | 9399.345599 | 4441.535158 | 1.081387785  | 9.69E-39 | 1.64E-36 | IFI6      | protein_coding       |
| ENSG00000123689 | 1197.471882 | 2738.670093 | -1.193755841 | 1.59E-38 | 2.63E-36 | GOS2      | protein_coding       |

|                 |             |             |              |          |          |            |                      |
|-----------------|-------------|-------------|--------------|----------|----------|------------|----------------------|
| ENSG00000180776 | 562.3908994 | 1255.760172 | -1.159229195 | 2.02E-38 | 3.31E-36 | ZDHHC20    | protein_coding       |
| ENSG00000187908 | 263.946073  | 41.61958694 | 2.662633323  | 1.62E-37 | 2.57E-35 | DMBT1      | protein_coding       |
| ENSG00000134326 | 688.5327266 | 265.0963276 | 1.377114802  | 2.81E-37 | 4.39E-35 | CMPK2      | protein_coding       |
| ENSG00000166736 | 392.4480573 | 91.3716507  | 2.105908906  | 7.74E-36 | 1.14E-33 | HTR3A      | protein_coding       |
| ENSG00000068078 | 829.557161  | 341.381484  | 1.280266494  | 1.49E-35 | 2.12E-33 | FGFR3      | protein_coding       |
| ENSG00000155893 | 480.5019033 | 150.986912  | 1.671167213  | 5.27E-35 | 7.22E-33 | PXYLP1     | protein_coding       |
| ENSG00000064652 | 184.9013477 | 580.0591918 | -1.648696571 | 2.08E-34 | 2.80E-32 | SNX24      | protein_coding       |
| ENSG00000104756 | 330.1802777 | 785.4375354 | -1.2506862   | 3.60E-34 | 4.80E-32 | KCTD9      | protein_coding       |
| ENSG00000039987 | 255.4207334 | 37.34736855 | 2.768552408  | 1.77E-33 | 2.33E-31 | BEST2      | protein_coding       |
| ENSG00000174804 | 1047.633366 | 494.2676813 | 1.083715533  | 7.92E-33 | 1.01E-30 | FZD4       | protein_coding       |
| ENSG00000031691 | 259.6444199 | 688.1971054 | -1.406301383 | 1.10E-32 | 1.39E-30 | CENPQ      | protein_coding       |
| ENSG00000049249 | 360.601148  | 817.8374543 | -1.181488976 | 5.34E-32 | 6.63E-30 | TNFRSF9    | protein_coding       |
| ENSG00000060491 | 1843.07617  | 822.4932112 | 1.163596253  | 5.42E-32 | 6.65E-30 | OGFR       | protein_coding       |
| ENSG00000244398 | 880.3705795 | 1897.513926 | -1.107931959 | 6.04E-32 | 7.35E-30 | AC116533.1 | processed_pseudogene |
| ENSG00000128923 | 294.417045  | 764.8556457 | -1.377291458 | 1.43E-31 | 1.71E-29 | MINDY2     | protein_coding       |
| ENSG00000204767 | 119.9165823 | 393.6099704 | -1.714562171 | 6.14E-31 | 7.10E-29 | INSYN2B    | protein_coding       |
| ENSG00000168453 | 1564.491881 | 730.7817939 | 1.097537033  | 7.82E-31 | 8.93E-29 | HR         | protein_coding       |
| ENSG00000173432 | 3267.278534 | 1466.791489 | 1.155021393  | 1.57E-30 | 1.77E-28 | SAA1       | protein_coding       |
| ENSG00000178150 | 201.3186224 | 533.5738188 | -1.406598265 | 2.10E-30 | 2.34E-28 | ZNF114     | protein_coding       |
| ENSG00000187193 | 788.5398913 | 335.792152  | 1.230674285  | 2.60E-30 | 2.87E-28 | MT1X       | protein_coding       |
| ENSG00000221869 | 2737.70214  | 1253.852434 | 1.126277583  | 6.31E-30 | 6.77E-28 | CEBPD      | protein_coding       |
| ENSG00000141959 | 1519.242518 | 720.0140926 | 1.076670147  | 2.60E-29 | 2.69E-27 | PFKL       | protein_coding       |
| ENSG00000143845 | 424.9047952 | 144.7084801 | 1.554342437  | 2.74E-29 | 2.81E-27 | ETNK2      | protein_coding       |
| ENSG00000109906 | 220.2232683 | 36.76680967 | 2.586348703  | 2.22E-28 | 2.19E-26 | ZBTB16     | protein_coding       |
| ENSG00000231412 | 165.6728084 | 475.4886403 | -1.520188158 | 3.34E-28 | 3.27E-26 | AC005392.2 | lincRNA              |
| ENSG00000226380 | 46.35839467 | 244.6055203 | -2.405738463 | 3.79E-28 | 3.68E-26 | LINC-PINT  | lincRNA              |
| ENSG00000076554 | 289.4161822 | 665.8459946 | -1.202622056 | 4.10E-28 | 3.94E-26 | TPD52      | protein_coding       |
| ENSG00000157450 | 596.0780601 | 1290.635847 | -1.114670434 | 4.63E-28 | 4.42E-26 | RNF111     | protein_coding       |
| ENSG00000110446 | 662.24353   | 250.6272282 | 1.401048402  | 6.75E-28 | 6.33E-26 | SLC15A3    | protein_coding       |
| ENSG00000133106 | 967.6647408 | 447.7963144 | 1.112543579  | 2.26E-27 | 2.07E-25 | EPSTI1     | protein_coding       |
| ENSG00000158292 | 1122.605756 | 560.3380167 | 1.002702314  | 2.69E-27 | 2.44E-25 | GPR153     | protein_coding       |
| ENSG00000116701 | 417.7903963 | 859.7121937 | -1.041193686 | 6.85E-27 | 6.02E-25 | NCF2       | protein_coding       |
| ENSG00000111077 | 832.5091933 | 409.827868  | 1.021996537  | 3.42E-25 | 2.83E-23 | TNS2       | protein_coding       |
| ENSG00000157168 | 349.4883447 | 737.0579115 | -1.07642869  | 2.89E-24 | 2.28E-22 | NRG1       | protein_coding       |
| ENSG00000100767 | 415.5769331 | 150.1584564 | 1.468159424  | 3.25E-24 | 2.56E-22 | PAPLN      | protein_coding       |
| ENSG00000181333 | 232.5372774 | 578.2160753 | -1.314606716 | 1.60E-23 | 1.22E-21 | HEPHL1     | protein_coding       |
| ENSG00000170989 | 103.2395638 | 317.026481  | -1.618875948 | 3.81E-23 | 2.86E-21 | S1PR1      | protein_coding       |
| ENSG00000141384 | 84.33555397 | 287.837631  | -1.771339689 | 4.82E-23 | 3.58E-21 | TAF4B      | protein_coding       |
| ENSG00000167191 | 126.320993  | 352.767213  | -1.483174937 | 6.23E-23 | 4.61E-21 | GPRC5B     | protein_coding       |
| ENSG00000205426 | 83.00607998 | 279.5406954 | -1.750433435 | 6.81E-23 | 5.00E-21 | KRT81      | protein_coding       |
| ENSG00000172667 | 265.1289475 | 566.2572048 | -1.094640306 | 1.03E-22 | 7.40E-21 | ZMAT3      | protein_coding       |
| ENSG00000144228 | 152.7648197 | 409.8575067 | -1.423483237 | 1.04E-22 | 7.48E-21 | SPOPL      | protein_coding       |
| ENSG00000129480 | 154.6795502 | 404.3725445 | -1.385096263 | 1.07E-22 | 7.62E-21 | DTD2       | protein_coding       |

|                 |             |             |              |          |          |            |                                    |
|-----------------|-------------|-------------|--------------|----------|----------|------------|------------------------------------|
| ENSG00000197766 | 975.4912851 | 436.202819  | 1.160332752  | 1.11E-22 | 7.84E-21 | CFD        | protein_coding                     |
| ENSG00000166147 | 890.8893088 | 441.2200206 | 1.014062813  | 6.77E-22 | 4.56E-20 | FBN1       | protein_coding                     |
| ENSG00000067798 | 149.8890675 | 420.5049753 | -1.488843471 | 1.06E-21 | 7.08E-20 | NAV3       | protein_coding                     |
| ENSG00000260604 | 603.8031198 | 274.4883017 | 1.137027905  | 1.65E-21 | 1.08E-19 | AL590004.3 | lincRNA                            |
| ENSG00000003989 | 422.2049976 | 176.2856104 | 1.260566413  | 8.50E-21 | 5.29E-19 | SLC7A2     | protein_coding                     |
| ENSG00000186847 | 306.6851341 | 715.7859865 | -1.223292267 | 1.64E-20 | 9.98E-19 | KRT14      | protein_coding                     |
| ENSG00000105855 | 669.2957531 | 316.7428452 | 1.080213386  | 1.88E-20 | 1.14E-18 | ITGB8      | protein_coding                     |
| ENSG00000091592 | 283.3229691 | 612.6208836 | -1.113706382 | 2.17E-20 | 1.31E-18 | NLRP1      | protein_coding                     |
| ENSG00000109452 | 508.6149462 | 1072.980547 | -1.077087547 | 7.93E-20 | 4.59E-18 | INPP4B     | protein_coding                     |
| ENSG00000185947 | 456.7926469 | 200.9854042 | 1.185160379  | 1.42E-19 | 8.07E-18 | ZNF267     | protein_coding                     |
| ENSG00000187134 | 194.953513  | 448.2174558 | -1.199885898 | 2.10E-19 | 1.19E-17 | AKR1C1     | protein_coding                     |
| ENSG00000136286 | 579.3181789 | 257.5932744 | 1.169015663  | 2.81E-19 | 1.55E-17 | MYO1G      | protein_coding                     |
| ENSG00000149968 | 14.11166797 | 110.0267691 | -2.960231637 | 3.41E-19 | 1.87E-17 | MMP3       | protein_coding                     |
| ENSG00000100292 | 316.1923364 | 671.9813397 | -1.088031315 | 4.02E-19 | 2.18E-17 | HMOX1      | protein_coding                     |
| ENSG00000226145 | 57.86509993 | 245.8184842 | -2.081460918 | 6.57E-19 | 3.50E-17 | KRT16P6    | transcribed_unprocessed_pseudogene |
| ENSG00000170571 | 356.7333561 | 736.9462688 | -1.045730323 | 2.80E-18 | 1.44E-16 | EMB        | protein_coding                     |
| ENSG00000149596 | 569.9589501 | 245.1213514 | 1.215578841  | 1.23E-17 | 6.06E-16 | JPH2       | protein_coding                     |
| ENSG00000164400 | 68.34590348 | 213.9736568 | -1.648495067 | 1.36E-17 | 6.70E-16 | CSF2       | protein_coding                     |
| ENSG00000144815 | 202.2800712 | 446.3666639 | -1.141584349 | 2.48E-17 | 1.19E-15 | NXPE3      | protein_coding                     |
| ENSG00000164283 | 5.171145563 | 79.20753796 | -3.94349557  | 2.72E-17 | 1.30E-15 | ESM1       | protein_coding                     |
| ENSG00000087303 | 307.2636556 | 125.7451285 | 1.28894404   | 6.81E-17 | 3.19E-15 | NID2       | protein_coding                     |
| ENSG00000184792 | 355.7455907 | 149.3810698 | 1.250519952  | 7.27E-17 | 3.38E-15 | OSBP2      | protein_coding                     |
| ENSG00000113657 | 145.7741474 | 337.1419717 | -1.208736781 | 3.77E-16 | 1.64E-14 | DPYSL3     | protein_coding                     |
| ENSG00000264112 | 118.7463236 | 297.4719206 | -1.324719384 | 6.27E-16 | 2.68E-14 | AC015813.1 | lincRNA                            |
| ENSG00000204611 | 272.0666976 | 108.3512061 | 1.32756479   | 2.30E-15 | 9.41E-14 | ZNF616     | protein_coding                     |
| ENSG00000254726 | 406.4431025 | 195.335973  | 1.056123988  | 5.73E-15 | 2.27E-13 | MEX3A      | protein_coding                     |
| ENSG00000120910 | 181.4567094 | 403.6948475 | -1.153974356 | 8.22E-15 | 3.22E-13 | PPP3CC     | protein_coding                     |
| ENSG00000277758 | 507.2517991 | 246.2378444 | 1.042129231  | 1.05E-14 | 4.05E-13 | FO681492.1 | protein_coding                     |
| ENSG00000197142 | 395.0644927 | 195.8236165 | 1.012497475  | 1.28E-14 | 4.87E-13 | ACSL5      | protein_coding                     |
| ENSG00000075213 | 171.7181351 | 376.9960032 | -1.13366145  | 1.75E-14 | 6.56E-13 | SEMA3A     | protein_coding                     |
| ENSG00000147100 | 31.34429895 | 141.9077997 | -2.174942258 | 2.46E-14 | 9.09E-13 | SLC16A2    | protein_coding                     |
| ENSG00000134996 | 197.7581136 | 411.9981276 | -1.058835494 | 4.04E-14 | 1.47E-12 | OSTF1      | protein_coding                     |
| ENSG00000119979 | 192.2537154 | 399.2771146 | -1.053042747 | 1.03E-13 | 3.63E-12 | FAM45A     | protein_coding                     |
| ENSG00000124641 | 160.5709991 | 347.6163812 | -1.116102151 | 2.18E-13 | 7.36E-12 | MED20      | protein_coding                     |
| ENSG00000107159 | 158.5597489 | 39.10936821 | 2.016993076  | 5.71E-13 | 1.84E-11 | CA9        | protein_coding                     |
| ENSG00000120833 | 172.6671771 | 352.6991323 | -1.031381097 | 6.74E-13 | 2.15E-11 | SOCS2      | protein_coding                     |
| ENSG00000132530 | 112.813389  | 29.02337688 | 1.95764878   | 1.19E-12 | 3.73E-11 | XAF1       | protein_coding                     |
| ENSG00000144810 | 205.430562  | 74.89561911 | 1.454984073  | 1.71E-12 | 5.27E-11 | COL8A1     | protein_coding                     |
| ENSG00000136378 | 93.90390358 | 18.40300576 | 2.350287465  | 1.84E-12 | 5.67E-11 | ADAMTS7    | protein_coding                     |
| ENSG00000137745 | 144.4832006 | 44.67806424 | 1.692535223  | 2.15E-12 | 6.58E-11 | MMP13      | protein_coding                     |
| ENSG00000005469 | 115.0458341 | 260.3636387 | -1.176919697 | 2.18E-12 | 6.63E-11 | CROT       | protein_coding                     |
| ENSG00000047936 | 289.4090783 | 124.9234886 | 1.212447055  | 3.85E-12 | 1.14E-10 | ROS1       | protein_coding                     |
| ENSG00000146700 | 34.80106792 | 128.7788571 | -1.884484034 | 6.10E-12 | 1.76E-10 | SSC4D      | protein_coding                     |



|                 |             |             |              |          |          |            |                      |
|-----------------|-------------|-------------|--------------|----------|----------|------------|----------------------|
| ENSG00000165124 | 278.7905802 | 127.1009282 | 1.134137804  | 8.51E-12 | 2.43E-10 | SVEP1      | protein_coding       |
| ENSG00000137573 | 207.7355908 | 86.10778351 | 1.26952316   | 9.56E-12 | 2.71E-10 | SULF1      | protein_coding       |
| ENSG00000173702 | 300.9006944 | 140.3324663 | 1.100947368  | 1.03E-11 | 2.91E-10 | MUC13      | protein_coding       |
| ENSG00000182795 | 66.91007821 | 177.838898  | -1.410655546 | 1.13E-11 | 3.20E-10 | C1orf116   | protein_coding       |
| ENSG00000157601 | 215.336693  | 86.57338121 | 1.313673821  | 1.33E-11 | 3.70E-10 | MX1        | protein_coding       |
| ENSG00000153071 | 139.483828  | 294.0420194 | -1.074388001 | 1.36E-11 | 3.78E-10 | DAB2       | protein_coding       |
| ENSG00000184497 | 70.29320033 | 180.9345827 | -1.363668088 | 2.68E-11 | 7.13E-10 | TMEM255B   | protein_coding       |
| ENSG00000174206 | 113.5028833 | 249.4107671 | -1.1358034   | 3.11E-11 | 8.19E-10 | C12orf66   | protein_coding       |
| ENSG00000239620 | 145.3375239 | 50.96389632 | 1.51197208   | 4.78E-11 | 1.24E-09 | PRR20G     | protein_coding       |
| ENSG00000185885 | 2222.444682 | 906.9852765 | 1.292751793  | 5.55E-11 | 1.42E-09 | IFITM1     | protein_coding       |
| ENSG00000138061 | 235.0382695 | 105.5641844 | 1.156016991  | 5.61E-11 | 1.43E-09 | CYP1B1     | protein_coding       |
| ENSG00000161896 | 183.3172947 | 67.47308103 | 1.444035969  | 9.91E-11 | 2.43E-09 | IP6K3      | protein_coding       |
| ENSG00000182585 | 170.2265582 | 64.84875396 | 1.393502913  | 1.81E-10 | 4.26E-09 | EPGN       | protein_coding       |
| ENSG00000141664 | 364.2796189 | 179.1725831 | 1.02366285   | 3.68E-10 | 8.24E-09 | ZCCHC2     | protein_coding       |
| ENSG00000129521 | 244.4729462 | 116.6029185 | 1.069072734  | 3.80E-10 | 8.51E-09 | EGLN3      | protein_coding       |
| ENSG00000111863 | 33.22526187 | 109.1739774 | -1.712006328 | 4.44E-10 | 9.85E-09 | ADTRP      | protein_coding       |
| ENSG00000138615 | 88.96641616 | 20.01362095 | 2.158019789  | 4.93E-10 | 1.09E-08 | CILP       | protein_coding       |
| ENSG00000059804 | 18.23771358 | 79.03268047 | -2.11194013  | 5.09E-10 | 1.12E-08 | SLC2A3     | protein_coding       |
| ENSG00000171033 | 45.45995234 | 138.3863691 | -1.611771183 | 5.36E-10 | 1.17E-08 | PKIA       | protein_coding       |
| ENSG00000181634 | 133.7397746 | 267.5467944 | -1.001451566 | 6.06E-10 | 1.31E-08 | TNFSF15    | protein_coding       |
| ENSG00000182263 | 133.392336  | 276.8413003 | -1.054984789 | 6.98E-10 | 1.49E-08 | FIGN       | protein_coding       |
| ENSG00000232472 | 107.8833307 | 223.9093366 | -1.053446997 | 1.32E-09 | 2.70E-08 | EEF1B2P3   | processed_pseudogene |
| ENSG00000146147 | 36.1865244  | 0           | 7.581845052  | 2.08E-09 | 4.13E-08 | MLIP       | protein_coding       |
| ENSG00000230882 | 100.5111634 | 213.808758  | -1.088327144 | 2.33E-09 | 4.62E-08 | AC005077.4 | processed_pseudogene |
| ENSG00000168952 | 85.63919656 | 195.6511077 | -1.192654284 | 3.20E-09 | 6.27E-08 | STXBP6     | protein_coding       |
| ENSG00000248607 | 133.6820129 | 50.77865724 | 1.394532917  | 3.34E-09 | 6.52E-08 | AC117422.1 | antisense            |
| ENSG00000065325 | 58.22767138 | 10.89240106 | 2.414326162  | 3.70E-09 | 7.16E-08 | GLP2R      | protein_coding       |
| ENSG00000117594 | 95.15086949 | 205.7952795 | -1.112472014 | 5.02E-09 | 9.51E-08 | HSD11B1    | protein_coding       |
| ENSG00000128512 | 104.2228585 | 214.7355347 | -1.041641681 | 6.12E-09 | 1.14E-07 | DOCK4      | protein_coding       |
| ENSG00000144893 | 43.13382992 | 123.3388394 | -1.512578138 | 6.56E-09 | 1.22E-07 | MED12L     | protein_coding       |
| ENSG00000104892 | 33.13891926 | 100.7337488 | -1.603930039 | 1.07E-08 | 1.93E-07 | KLC3       | protein_coding       |
| ENSG00000143369 | 90.74520942 | 190.8755169 | -1.07316554  | 1.35E-08 | 2.40E-07 | ECM1       | protein_coding       |
| ENSG00000011465 | 46.71214116 | 6.869372368 | 2.770949688  | 1.45E-08 | 2.55E-07 | DCN        | protein_coding       |
| ENSG00000198074 | 87.88611655 | 27.62787674 | 1.668460784  | 1.86E-08 | 3.21E-07 | AKR1B10    | protein_coding       |
| ENSG00000157343 | 43.00981429 | 5.510649758 | 2.971558681  | 3.32E-08 | 5.53E-07 | ARMC12     | protein_coding       |
| ENSG00000166510 | 79.60919895 | 171.2150153 | -1.105784709 | 3.54E-08 | 5.86E-07 | CCDC68     | protein_coding       |
| ENSG00000285106 | 28.701467   | 91.51022927 | -1.667201071 | 3.70E-08 | 6.11E-07 | AC016831.6 | lincRNA              |
| ENSG00000053918 | 101.2815466 | 35.71419167 | 1.506518764  | 5.10E-08 | 8.15E-07 | KCNQ1      | protein_coding       |
| ENSG00000166922 | 19.03874583 | 71.86147787 | -1.919999216 | 7.30E-08 | 1.14E-06 | SCG5       | protein_coding       |
| ENSG00000225886 | 78.05970948 | 24.62389001 | 1.664882759  | 7.97E-08 | 1.23E-06 | AL445490.1 | antisense            |
| ENSG00000117151 | 54.00946045 | 129.2866965 | -1.259241552 | 8.30E-08 | 1.27E-06 | CTBS       | protein_coding       |
| ENSG00000117407 | 90.48595074 | 183.8778203 | -1.022828716 | 1.04E-07 | 1.56E-06 | ARTN       | protein_coding       |
| ENSG00000168961 | 171.6859159 | 79.68927721 | 1.108491614  | 1.18E-07 | 1.76E-06 | LGALS9     | protein_coding       |

|                 |             |             |              |          |             |            |                                    |
|-----------------|-------------|-------------|--------------|----------|-------------|------------|------------------------------------|
| ENSG00000119698 | 89.44710056 | 185.5547933 | -1.0522716   | 1.47E-07 | 2.16E-06    | PPP4R4     | protein_coding                     |
| ENSG00000133069 | 63.69878717 | 142.2993438 | -1.15719439  | 1.99E-07 | 2.87E-06    | TMCC2      | protein_coding                     |
| ENSG00000144063 | 67.94368362 | 154.401576  | -1.184813137 | 2.20E-07 | 3.15E-06    | MALL       | protein_coding                     |
| ENSG00000057657 | 61.68635761 | 138.1412337 | -1.163659809 | 2.26E-07 | 3.22E-06    | PRDM1      | protein_coding                     |
| ENSG00000135119 | 47.98981427 | 118.3822082 | -1.300792466 | 3.06E-07 | 4.26E-06    | RNFT2      | protein_coding                     |
| ENSG00000127129 | 51.61290244 | 10.91466702 | 2.238593303  | 3.37E-07 | 4.66E-06    | EDN2       | protein_coding                     |
| ENSG00000220517 | 38.72157298 | 6.126913268 | 2.657192751  | 6.62E-07 | 8.71E-06    | ASS1P1     | processed_pseudogene               |
| ENSG00000105550 | 170.6656423 | 79.90916523 | 1.095616874  | 6.92E-07 | 9.06E-06    | FGF21      | protein_coding                     |
| ENSG00000181773 | 163.6234001 | 78.74080889 | 1.054692516  | 7.71E-07 | 1.00E-05    | GPR3       | protein_coding                     |
| ENSG00000256393 | 32.21089097 | 100.383408  | -1.641815045 | 9.95E-07 | 1.26E-05    | RPL41P5    | processed_pseudogene               |
| ENSG00000246985 | 11.16963995 | 48.07031785 | -2.101138564 | 1.03E-06 | 1.30E-05    | SOCS2-AS1  | processed_transcript               |
| ENSG00000169306 | 11.9040493  | 49.2314184  | -2.048776346 | 1.07E-06 | 1.33E-05    | IL1RAPL1   | protein_coding                     |
| ENSG00000166394 | 7.190251962 | 42.51968909 | -2.577796906 | 1.15E-06 | 1.43E-05    | CYB5R2     | protein_coding                     |
| ENSG00000132932 | 43.82085088 | 105.6050163 | -1.269426301 | 1.32E-06 | 1.62E-05    | ATP8A2     | protein_coding                     |
| ENSG00000257219 | 60.65679574 | 133.4828014 | -1.136798727 | 1.37E-06 | 1.68E-05    | LINC02407  | lincRNA                            |
| ENSG00000274943 | 18.04771111 | 59.41678645 | -1.72130514  | 1.51E-06 | 1.83E-05    | AC079684.1 | sense_intronic                     |
| ENSG00000214357 | 147.1785276 | 70.85132168 | 1.056645497  | 1.61E-06 | 1.94E-05    | NEURL1B    | protein_coding                     |
| ENSG00000232909 | 35.92803988 | 4.449424531 | 3.016479513  | 1.66E-06 | 2.00E-05    | AL157823.2 | antisense                          |
| ENSG00000079263 | 28.9862681  | 79.19757931 | -1.451808448 | 1.91E-06 | 2.26E-05    | SP140      | protein_coding                     |
| ENSG00000103313 | 61.85890474 | 19.12910325 | 1.693416857  | 2.07E-06 | 2.45E-05    | MEFV       | protein_coding                     |
| ENSG00000225383 | 47.60576579 | 111.1601979 | -1.222757373 | 2.20E-06 | 2.59E-05    | SFTA1P     | lincRNA                            |
| ENSG00000067715 | 52.95690949 | 122.6536323 | -1.209578241 | 2.44E-06 | 2.83E-05    | SYT1       | protein_coding                     |
| ENSG00000164120 | 130.4217852 | 60.06420169 | 1.119402574  | 3.10E-06 | 3.51E-05    | HPGD       | protein_coding                     |
| ENSG00000174640 | 131.5928762 | 64.50879476 | 1.027977448  | 3.18E-06 | 3.59E-05    | SLCO2A1    | protein_coding                     |
| ENSG00000153233 | 37.93530465 | 91.0947893  | -1.263354943 | 3.27E-06 | 3.67E-05    | PTPRR      | protein_coding                     |
| ENSG00000248588 | 19.22172436 | 60.56337543 | -1.653212589 | 3.42E-06 | 3.82E-05    | AC008517.1 | lincRNA                            |
| ENSG00000278619 | 153.3825844 | 75.21510391 | 1.025580016  | 3.51E-06 | 3.89E-05    | MRM1       | protein_coding                     |
| ENSG00000250771 | 24.0476957  | 1.365978394 | 4.137080785  | 3.55E-06 | 3.94E-05    | AC106865.1 | transcribed_unprocessed_pseudogene |
| ENSG00000188856 | 107.6884306 | 220.0988473 | -1.03051345  | 4.25E-06 | 4.64E-05    | RPSAP47    | processed_pseudogene               |
| ENSG00000137198 | 130.9625537 | 64.30206687 | 1.026882178  | 4.29E-06 | 4.68E-05    | GMPR       | protein_coding                     |
| ENSG00000196196 | 113.6714669 | 53.243137   | 1.092570401  | 7.28E-06 | 7.57E-05    | HRCT1      | protein_coding                     |
| ENSG00000277196 | 41.18099933 | 9.908785192 | 2.05435295   | 7.46E-06 | 7.73E-05    | AC007325.2 | protein_coding                     |
| ENSG00000064205 | 31.38644257 | 4.440318704 | 2.821392159  | 7.51E-06 | 7.76E-05    | WISP2      | protein_coding                     |
| ENSG00000167656 | 30.89724404 | 4.40218974  | 2.802525475  | 8.39E-06 | 8.58E-05    | LY6D       | protein_coding                     |
| ENSG00000197405 | 93.84530962 | 41.42516635 | 1.180600076  | 9.90E-06 | 9.99E-05    | C5AR1      | protein_coding                     |
| ENSG00000204616 | 62.91919568 | 21.61805323 | 1.542480319  | 1.10E-05 | 0.000109287 | TRIM31     | protein_coding                     |
| ENSG00000204176 | 130.1911874 | 62.74779231 | 1.05162577   | 1.19E-05 | 0.00011707  | SYT15      | protein_coding                     |
| ENSG00000210144 | 128.5886377 | 58.08140269 | 1.142925776  | 1.53E-05 | 0.000145046 | MT-TY      | Mt_tRNA                            |
| ENSG00000141744 | 58.63095437 | 19.81757038 | 1.563715619  | 1.69E-05 | 0.000158643 | PNMT       | protein_coding                     |
| ENSG00000179869 | 43.11347415 | 94.7408612  | -1.1362753   | 1.90E-05 | 0.000175532 | ABCA13     | protein_coding                     |
| ENSG00000187689 | 38.47154448 | 87.16950734 | -1.178636436 | 2.06E-05 | 0.000189716 | AMTN       | protein_coding                     |
| ENSG00000008118 | 28.91772793 | 73.47835162 | -1.345301414 | 2.24E-05 | 0.000204145 | CAMK1G     | protein_coding                     |
| ENSG00000162520 | 61.20481908 | 21.1685386  | 1.530178816  | 2.60E-05 | 0.000231041 | SYNC       | protein_coding                     |

|                 |             |             |              |             |             |            |                                  |
|-----------------|-------------|-------------|--------------|-------------|-------------|------------|----------------------------------|
| ENSG00000117245 | 33.97776263 | 80.49455556 | -1.243583337 | 2.78E-05    | 0.000244758 | KIF17      | protein_coding                   |
| ENSG00000131386 | 41.72021956 | 10.68161886 | 1.971501981  | 3.06E-05    | 0.000266676 | GALNT15    | protein_coding                   |
| ENSG00000182866 | 7.390258772 | 33.03729974 | -2.161316072 | 3.25E-05    | 0.000281886 | LCK        | protein_coding                   |
| ENSG00000154556 | 36.37354647 | 8.596798767 | 2.084988672  | 3.28E-05    | 0.000283773 | SORBS2     | protein_coding                   |
| ENSG00000242779 | 77.12494623 | 32.79614297 | 1.231861599  | 3.52E-05    | 0.000301518 | ZNF702P    | transcribed_processed_pseudogene |
| ENSG00000004799 | 138.7512197 | 59.40283197 | 1.22650882   | 3.64E-05    | 0.000310519 | PKD4       | protein_coding                   |
| ENSG00000134539 | 30.37356188 | 5.412624477 | 2.47850143   | 3.93E-05    | 0.000332959 | KLRD1      | protein_coding                   |
| ENSG00000269896 | 51.08113321 | 15.77953152 | 1.695324172  | 4.33E-05    | 0.000362879 | AL513477.1 | transcribed_processed_pseudogene |
| ENSG00000162006 | 117.7990608 | 57.63486948 | 1.031196241  | 4.52E-05    | 0.000376491 | MSLN       | protein_coding                   |
| ENSG00000163751 | 4.214167394 | 26.08248794 | -2.635740627 | 4.90E-05    | 0.000405233 | CPA3       | protein_coding                   |
| ENSG00000224858 | 28.27668513 | 82.46378171 | -1.539906411 | 5.10E-05    | 0.000419066 | RPL29P11   | processed_pseudogene             |
| ENSG00000224389 | 34.60851211 | 7.124187872 | 2.275317032  | 5.52E-05    | 0.000450155 | C4B        | protein_coding                   |
| ENSG00000241494 | 30.18837711 | 84.79671862 | -1.488897631 | 5.57E-05    | 0.000453596 | AL355032.1 | processed_pseudogene             |
| ENSG00000144583 | 28.90368005 | 69.2724325  | -1.261168036 | 6.02E-05    | 0.000486515 | 4-Mar      | protein_coding                   |
| ENSG00000249364 | 22.60960606 | 3.092053357 | 2.873462742  | 6.15E-05    | 0.000495228 | AC112206.2 | lincRNA                          |
| ENSG00000169213 | 39.7566686  | 87.53443537 | -1.135980435 | 6.15E-05    | 0.000495228 | RAB3B      | protein_coding                   |
| ENSG00000168874 | 34.69847119 | 8.166348618 | 2.086102988  | 7.39E-05    | 0.000581895 | ATOX1      | protein_coding                   |
| ENSG00000245648 | 94.74119862 | 45.65925578 | 1.055634216  | 8.28E-05    | 0.000643615 | AC022075.1 | antisense                        |
| ENSG00000185565 | 11.27628022 | 41.80247736 | -1.891259931 | 8.39E-05    | 0.000651145 | LSAMP      | protein_coding                   |
| ENSG00000179583 | 77.38681637 | 33.97310653 | 1.190163815  | 8.44E-05    | 0.000654792 | CIITA      | protein_coding                   |
| ENSG00000135678 | 82.2960918  | 37.16745953 | 1.143955482  | 8.59E-05    | 0.000664725 | CPM        | protein_coding                   |
| ENSG00000182261 | 31.98568884 | 72.50569163 | -1.177728799 | 9.88E-05    | 0.000750036 | NLRP10     | protein_coding                   |
| ENSG00000165548 | 39.92886863 | 11.23528319 | 1.82592565   | 9.92E-05    | 0.000752842 | TMEM63C    | protein_coding                   |
| ENSG00000144821 | 16.22116051 | 48.64012372 | -1.577255736 | 0.000101229 | 0.000766094 | MYH15      | protein_coding                   |
| ENSG0000011201  | 55.03234548 | 110.5711075 | -1.003090315 | 0.000101879 | 0.000769598 | ANOS1      | protein_coding                   |
| ENSG00000104760 | 42.88898805 | 12.70654265 | 1.757022946  | 0.000104892 | 0.000789095 | FGL1       | protein_coding                   |
| ENSG00000197467 | 14.70644363 | 44.66220124 | -1.600086015 | 0.000106818 | 0.000801377 | COL13A1    | protein_coding                   |
| ENSG00000137878 | 47.78797017 | 96.41984576 | -1.01507435  | 0.000120988 | 0.000899472 | GCOM1      | protein_coding                   |
| ENSG00000268350 | 53.34111792 | 11.60989132 | 2.198606631  | 0.000125786 | 0.000931234 | FAM156A    | protein_coding                   |
| ENSG00000116678 | 62.40480182 | 26.09970238 | 1.260114367  | 0.000145135 | 0.001058394 | LEPR       | protein_coding                   |
| ENSG00000133328 | 68.05889614 | 27.14911891 | 1.330229007  | 0.000152097 | 0.001105732 | HRASLS2    | protein_coding                   |
| ENSG00000226237 | 26.27305869 | 5.124232922 | 2.355002978  | 0.00015236  | 0.001106665 | GAS1RR     | lincRNA                          |
| ENSG00000174125 | 4.800428921 | 25.53017505 | -2.405115109 | 0.00016067  | 0.001160862 | TLR1       | protein_coding                   |
| ENSG00000187151 | 42.61610856 | 14.04299929 | 1.603726582  | 0.000161396 | 0.001165089 | ANGPTL5    | protein_coding                   |
| ENSG00000066056 | 1.588790789 | 17.03112302 | -3.411523108 | 0.000166699 | 0.001200206 | TIE1       | protein_coding                   |
| ENSG00000164744 | 27.73520053 | 63.54239333 | -1.198288712 | 0.000212663 | 0.001487465 | SUN3       | protein_coding                   |
| ENSG00000186567 | 66.98045567 | 28.91169285 | 1.209955168  | 0.000221072 | 0.001542344 | CEACAM19   | protein_coding                   |
| ENSG00000137501 | 17.11555931 | 48.84770444 | -1.505084611 | 0.00022956  | 0.001595459 | SYTL2      | protein_coding                   |
| ENSG00000155816 | 46.93436289 | 17.13099834 | 1.455350085  | 0.000237684 | 0.00164566  | FMN2       | protein_coding                   |
| ENSG00000102445 | 15.12569177 | 43.78571648 | -1.534017588 | 0.000279133 | 0.001887307 | RUBCNL     | protein_coding                   |
| ENSG00000155093 | 75.78177147 | 35.17796185 | 1.108186115  | 0.000284923 | 0.001920923 | PTPRN2     | protein_coding                   |
| ENSG00000229953 | 95.94224449 | 46.85927964 | 1.030902611  | 0.000309741 | 0.002067875 | AL590666.2 | antisense                        |
| ENSG00000242960 | 235.3411982 | 501.8957918 | -1.092070279 | 0.000313062 | 0.002087506 | FTH1P23    | processed_pseudogene             |

|                 |             |             |              |             |             |             |                                    |
|-----------------|-------------|-------------|--------------|-------------|-------------|-------------|------------------------------------|
| ENSG00000184838 | 36.10648969 | 76.44975952 | -1.084459934 | 0.000335027 | 0.00220968  | PRR16       | protein_coding                     |
| ENSG00000285294 | 39.88587087 | 81.81677918 | -1.036537313 | 0.000344542 | 0.002261614 | LINC00842   | lincRNA                            |
| ENSG00000197301 | 38.59337572 | 80.7727684  | -1.069716085 | 0.000348072 | 0.002282961 | AC090673.1  | antisense                          |
| ENSG00000166262 | 18.22140134 | 52.28747138 | -1.525513376 | 0.000358935 | 0.002343918 | FAM227B     | protein_coding                     |
| ENSG00000143434 | 85.21816925 | 42.08951748 | 1.01918558   | 0.000362535 | 0.002366486 | SEMA6C      | protein_coding                     |
| ENSG00000241935 | 80.79023615 | 37.85777671 | 1.091851462  | 0.000369092 | 0.002401653 | HOGA1       | protein_coding                     |
| ENSG00000248213 | 48.6957008  | 17.62697061 | 1.461749487  | 0.000381304 | 0.002466465 | CICP16      | processed_pseudogene               |
| ENSG00000166482 | 63.6892099  | 28.31449383 | 1.169560824  | 0.000382786 | 0.00247508  | MFAP4       | protein_coding                     |
| ENSG00000153294 | 27.14822297 | 61.54108695 | -1.177094375 | 0.000387995 | 0.002505801 | ADGRF4      | protein_coding                     |
| ENSG00000277142 | 48.94977284 | 19.49375274 | 1.329988283  | 0.000392237 | 0.002526345 | LINC00235   | lincRNA                            |
| ENSG00000256542 | 40.62177042 | 14.41355313 | 1.496358184  | 0.000402128 | 0.002582866 | AC148477.2  | antisense                          |
| ENSG00000169760 | 48.48236216 | 18.75719799 | 1.366661515  | 0.0004091   | 0.002622517 | NLGN1       | protein_coding                     |
| ENSG00000251169 | 34.12109275 | 8.83525266  | 1.943001395  | 0.000454377 | 0.002880176 | LINC01843   | lincRNA                            |
| ENSG00000223764 | 63.92654263 | 29.29675826 | 1.123680212  | 0.000518244 | 0.003226504 | LINC02593   | lincRNA                            |
| ENSG00000172967 | 66.8419651  | 28.25807753 | 1.246132861  | 0.000523828 | 0.003255101 | XKR3        | protein_coding                     |
| ENSG00000224260 | 28.4525816  | 7.844381012 | 1.855194606  | 0.000549553 | 0.003394421 | AL023754.1  | lincRNA                            |
| ENSG00000105696 | 36.83571239 | 76.48198413 | -1.05274859  | 0.000570633 | 0.003508794 | TMEM59L     | protein_coding                     |
| ENSG00000133519 | 25.48833867 | 59.90948157 | -1.227944747 | 0.000595431 | 0.003644907 | ZDHHC8P1    | transcribed_unprocessed_pseudogene |
| ENSG00000241749 | 39.20113613 | 81.69613372 | -1.063081044 | 0.000653607 | 0.003946482 | RPSAP52     | transcribed_processed_pseudogene   |
| ENSG00000244731 | 39.41447477 | 12.56988979 | 1.645718942  | 0.000663588 | 0.003996607 | C4A         | protein_coding                     |
| ENSG00000232316 | 15.1737962  | 1.699754697 | 3.151334007  | 0.000675196 | 0.004056112 | LINC02518   | lincRNA                            |
| ENSG00000280587 | 42.33351371 | 16.42076386 | 1.367359656  | 0.000713526 | 0.004266094 | LINC01348   | lincRNA                            |
| ENSG00000125798 | 16.12375043 | 41.42381492 | -1.36290099  | 0.000742512 | 0.004418497 | FOXA2       | protein_coding                     |
| ENSG00000162894 | 76.31382967 | 36.00983901 | 1.085687134  | 0.000746776 | 0.004437445 | FCMR        | protein_coding                     |
| ENSG00000277400 | 35.3029041  | 11.54544209 | 1.608386924  | 0.000760215 | 0.004507521 | AC145212.1  | protein_coding                     |
| ENSG00000110427 | 37.06793846 | 13.38590395 | 1.4711234    | 0.000827601 | 0.004861375 | KIAA1549L   | protein_coding                     |
| ENSG00000205670 | 85.95419782 | 9.929201109 | 3.114268087  | 0.000869518 | 0.005064227 | SMIM11A     | protein_coding                     |
| ENSG00000127863 | 5.496311112 | 23.82906892 | -2.117454023 | 0.000978527 | 0.005603766 | TNFRSF19    | protein_coding                     |
| ENSG00000234432 | 48.43758522 | 20.78937755 | 1.218925621  | 0.000979696 | 0.005608504 | AC092171.3  | lincRNA                            |
| ENSG00000117707 | 6.758446152 | 24.66066754 | -1.867786305 | 0.001005162 | 0.005730328 | PROX1       | protein_coding                     |
| ENSG00000163395 | 10.7733809  | 35.1685018  | -1.69900469  | 0.001041839 | 0.005902558 | IGFN1       | protein_coding                     |
| ENSG00000115705 | 15.03309938 | 2.020370867 | 2.882537433  | 0.001155708 | 0.006465199 | TPO         | protein_coding                     |
| ENSG00000248187 | 14.55496832 | 2.052595483 | 2.824710654  | 0.001181063 | 0.006577923 | AC078850.1  | lincRNA                            |
| ENSG00000260302 | 61.29116169 | 28.92485299 | 1.081178955  | 0.001201383 | 0.006682033 | AP005482.1  | lincRNA                            |
| ENSG00000102931 | 60.18313527 | 26.48263919 | 1.180340646  | 0.001233326 | 0.006838861 | ARL2BP      | protein_coding                     |
| ENSG00000177494 | 6.136637871 | 23.29333771 | -1.927208932 | 0.001364404 | 0.007479867 | ZBED2       | protein_coding                     |
| ENSG00000224081 | 20.32791349 | 47.0789476  | -1.214640354 | 0.001407566 | 0.00768061  | SLC44A3-AS1 | transcribed_processed_pseudogene   |
| ENSG00000137673 | 16.06415146 | 2.758277054 | 2.549478118  | 0.001454767 | 0.007890992 | MMP7        | protein_coding                     |
| ENSG00000272872 | 42.29945715 | 16.28460962 | 1.373386156  | 0.001540126 | 0.00827091  | AP000525.1  | sense_intronic                     |
| ENSG00000253313 | 7.995038777 | 26.36632658 | -1.717561869 | 0.001556257 | 0.008350522 | C1orf210    | protein_coding                     |
| ENSG00000125872 | 15.22935163 | 39.0637634  | -1.363084288 | 0.001587038 | 0.008493497 | LRRN4       | protein_coding                     |
| ENSG00000269376 | 61.55233764 | 28.36443149 | 1.116786357  | 0.001600094 | 0.008549443 | AL356740.3  | sense_intronic                     |

|                 |             |             |              |             |             |            |                                    |
|-----------------|-------------|-------------|--------------|-------------|-------------|------------|------------------------------------|
| ENSG00000188897 | 46.73690941 | 20.20078574 | 1.210085047  | 0.001615168 | 0.008615979 | AC099489.1 | protein_coding                     |
| ENSG00000273472 | 62.40408578 | 30.67589678 | 1.024198609  | 0.001634607 | 0.008708366 | AC096733.2 | lincRNA                            |
| ENSG00000160868 | 2.869444307 | 15.76501995 | -2.450303618 | 0.001639849 | 0.008733457 | CYP3A4     | protein_coding                     |
| ENSG00000228437 | 16.30119523 | 45.06660967 | -1.462783239 | 0.001678099 | 0.008925595 | LINC02474  | lincRNA                            |
| ENSG00000181781 | 17.03666771 | 2.68927491  | 2.649600427  | 0.001694753 | 0.009002521 | ODF3L2     | protein_coding                     |
| ENSG00000272221 | 56.20409438 | 26.52987398 | 1.080269544  | 0.001764181 | 0.009323091 | AL645933.2 | lincRNA                            |
| ENSG00000226472 | 59.93459697 | 28.84161782 | 1.056828021  | 0.001766508 | 0.009332387 | AC008013.1 | transcribed_unprocessed_pseudogene |
| ENSG00000234290 | 69.60577416 | 34.40512817 | 1.012543157  | 0.001773424 | 0.009362904 | AC116366.1 | antisense                          |
| ENSG00000229619 | 26.10234885 | 6.513330104 | 2.003869807  | 0.001794947 | 0.009461336 | MBNL1-AS1  | antisense                          |
| ENSG00000226007 | 15.77453267 | 2.718796654 | 2.530871465  | 0.001835727 | 0.009648433 | BX005266.2 | lincRNA                            |
| ENSG00000233328 | 36.73425877 | 73.56499114 | -1.00146245  | 0.001837617 | 0.009652191 | PFN1P1     | processed_pseudogene               |
| ENSG00000065413 | 32.45155121 | 67.75229108 | -1.060164536 | 0.001856606 | 0.009733479 | ANKRD44    | protein_coding                     |
| ENSG00000180264 | 53.77021044 | 25.60615444 | 1.070905655  | 0.001908612 | 0.009974077 | ADGRD2     | protein_coding                     |
| ENSG00000273045 | 17.00963509 | 40.85428759 | -1.261783717 | 0.00205787  | 0.010642368 | C2orf15    | protein_coding                     |
| ENSG00000008323 | 54.96976611 | 26.36177367 | 1.062843113  | 0.002144243 | 0.011005907 | PLEKHG6    | protein_coding                     |
| ENSG00000086717 | 23.16883498 | 6.105145915 | 1.918026186  | 0.002151146 | 0.01103789  | PPEF1      | protein_coding                     |
| ENSG00000223459 | 22.52446468 | 50.07702998 | -1.154389395 | 0.002227477 | 0.011404629 | TCAF1P1    | unprocessed_pseudogene             |
| ENSG00000005001 | 9.985622359 | 30.69545987 | -1.622184185 | 0.002309301 | 0.011772206 | PRSS22     | protein_coding                     |
| ENSG00000205809 | 56.51819245 | 27.67326149 | 1.03011479   | 0.00232191  | 0.011825474 | KLRC2      | protein_coding                     |
| ENSG00000127774 | 40.15143745 | 16.65921775 | 1.265817974  | 0.00234291  | 0.011917652 | EMC6       | protein_coding                     |
| ENSG00000268713 | 30.91129191 | 11.26430632 | 1.454648204  | 0.002354515 | 0.01196557  | AC005261.3 | lincRNA                            |
| ENSG00000130052 | 46.50135585 | 20.50233743 | 1.179655149  | 0.002413359 | 0.012219257 | STARD8     | protein_coding                     |
| ENSG00000284883 | 7.34619788  | 24.26969779 | -1.719851468 | 0.002577737 | 0.012935924 | AC021066.2 | unprocessed_pseudogene             |
| ENSG00000179593 | 24.33433409 | 7.544180759 | 1.692878743  | 0.002602877 | 0.01303819  | ALOX15B    | protein_coding                     |
| ENSG00000256083 | 9.356790141 | 29.12382648 | -1.643003964 | 0.0028584   | 0.014083492 | AC090673.2 | antisense                          |
| ENSG00000217236 | 3.248675087 | 15.65063306 | -2.278225469 | 0.002969874 | 0.014578738 | SP9        | protein_coding                     |
| ENSG00000151846 | 25.85203137 | 54.45147234 | -1.070502834 | 0.0029752   | 0.014600519 | PABPC3     | protein_coding                     |
| ENSG00000160870 | 10.64042406 | 29.67591931 | -1.48240947  | 0.002985866 | 0.014631013 | CYP3A7     | protein_coding                     |
| ENSG00000267780 | 15.01607111 | 2.355498606 | 2.660815008  | 0.003051904 | 0.014919007 | AC021594.2 | lincRNA                            |
| ENSG00000177989 | 66.03092851 | 31.33398934 | 1.074296483  | 0.003095363 | 0.015100004 | ODF3B      | protein_coding                     |
| ENSG00000253406 | 35.40358356 | 14.04299929 | 1.33472019   | 0.003124077 | 0.015212975 | AC012613.2 | antisense                          |
| ENSG00000254602 | 17.8540122  | 4.13741558  | 2.118132841  | 0.003189223 | 0.015502645 | AP000662.1 | sense_overlapping                  |
| ENSG00000019186 | 16.13077437 | 39.45125313 | -1.2939804   | 0.003243181 | 0.015746298 | CYP24A1    | protein_coding                     |
| ENSG00000272430 | 14.58349114 | 2.72014809  | 2.415597103  | 0.003353994 | 0.016215462 | AL356056.3 | lincRNA                            |
| ENSG00000169403 | 20.71941297 | 46.28597655 | -1.154173635 | 0.003359569 | 0.016234623 | PTAFR      | protein_coding                     |
| ENSG00000248569 | 26.9504224  | 59.62542286 | -1.148004422 | 0.003373226 | 0.016281462 | CRSP8P     | processed_pseudogene               |
| ENSG00000283689 | 17.9736372  | 4.446223053 | 2.015936046  | 0.003470968 | 0.016665111 | AC018553.2 | antisense                          |
| ENSG00000275038 | 13.00172428 | 2.058499831 | 2.658969956  | 0.003634794 | 0.01730503  | AC091980.2 | antisense                          |
| ENSG00000260088 | 12.41474672 | 32.57540213 | -1.385052137 | 0.003641295 | 0.017330962 | AL445483.1 | lincRNA                            |
| ENSG00000178342 | 34.76772741 | 13.92000518 | 1.315701604  | 0.00368171  | 0.017503036 | KCNG2      | protein_coding                     |
| ENSG00000260997 | 45.61446617 | 20.58905262 | 1.151967631  | 0.003796166 | 0.01794849  | AC004847.1 | sense_overlapping                  |
| ENSG00000223829 | 48.72124322 | 23.54175025 | 1.048996282  | 0.003845009 | 0.01812726  | AC004870.2 | processed_transcript               |

|                 |             |             |              |             |             |            |                                  |
|-----------------|-------------|-------------|--------------|-------------|-------------|------------|----------------------------------|
| ENSG00000175899 | 3.824932275 | 16.49111744 | -2.100425474 | 0.003985089 | 0.018685793 | A2M        | protein_coding                   |
| ENSG00000255642 | 15.4193541  | 37.90749431 | -1.295053105 | 0.004117679 | 0.019159861 | PABPC1P4   | processed_pseudogene             |
| ENSG00000132718 | 5.159651023 | 19.12049603 | -1.892611342 | 0.004304015 | 0.019874409 | SYT11      | protein_coding                   |
| ENSG00000266924 | 17.22816038 | 4.07296635  | 2.077189538  | 0.00468963  | 0.02143272  | AC021594.1 | lincRNA                          |
| ENSG00000167083 | 6.480321897 | 21.13496255 | -1.711756179 | 0.005053397 | 0.022828517 | GNGT2      | protein_coding                   |
| ENSG00000220685 | 3.238670748 | 14.63884689 | -2.183604138 | 0.005147074 | 0.023175233 | AL139094.1 | processed_pseudogene             |
| ENSG00000111325 | 40.49107794 | 18.39845285 | 1.136024448  | 0.00525301  | 0.023573069 | OGFOD2     | protein_coding                   |
| ENSG00000244734 | 35.17029436 | 14.64204836 | 1.263370947  | 0.005287563 | 0.023710335 | HBB        | protein_coding                   |
| ENSG00000229951 | 12.90508836 | 2.411340617 | 2.425343978  | 0.005351558 | 0.023951538 | FLJ31356   | antisense                        |
| ENSG00000230291 | 3.735320289 | 17.15731861 | -2.176861849 | 0.005581692 | 0.024779033 | AC078817.1 | processed_pseudogene             |
| ENSG00000183484 | 16.27671595 | 36.83233179 | -1.174945601 | 0.005629831 | 0.024932109 | GPR132     | protein_coding                   |
| ENSG00000139187 | 9.941561467 | 27.14641604 | -1.446284596 | 0.005982224 | 0.026259133 | KLRG1      | protein_coding                   |
| ENSG00000198732 | 25.30834054 | 9.191294923 | 1.459379006  | 0.006110659 | 0.026744306 | SMOC1      | protein_coding                   |
| ENSG00000179954 | 16.80260435 | 4.43306292  | 1.918699435  | 0.006129131 | 0.026791021 | SSC5D      | protein_coding                   |
| ENSG00000188488 | 22.88368678 | 7.82531653  | 1.543773602  | 0.006152328 | 0.026869417 | SERPINA5   | protein_coding                   |
| ENSG00000168517 | 30.18135317 | 12.26563523 | 1.297127843  | 0.006193934 | 0.027029572 | HEXIM2     | protein_coding                   |
| ENSG00000257718 | 16.37079853 | 3.702412518 | 2.133517366  | 0.006272328 | 0.027323199 | CPNE8-AS1  | antisense                        |
| ENSG00000258824 | 22.2666962  | 7.191339973 | 1.634699566  | 0.006272861 | 0.027323199 | AL122035.1 | antisense                        |
| ENSG00000249839 | 5.811472322 | 24.43289096 | -2.075359231 | 0.006427354 | 0.027892611 | AC011330.1 | unprocessed_pseudogene           |
| ENSG00000261499 | 9.710478506 | 26.0806379  | -1.428429246 | 0.006486806 | 0.02810607  | AC233699.1 | unprocessed_pseudogene           |
| ENSG00000250920 | 12.66251086 | 31.53274277 | -1.321155348 | 0.00656416  | 0.028381357 | AC105460.1 | lincRNA                          |
| ENSG00000152463 | 15.21934729 | 3.386349261 | 2.158716136  | 0.006700245 | 0.028870973 | OLAH       | protein_coding                   |
| ENSG00000186340 | 36.56128458 | 16.39579503 | 1.154205808  | 0.006897769 | 0.029628849 | THBS2      | protein_coding                   |
| ENSG00000260325 | 14.14721472 | 3.034859911 | 2.209784993  | 0.006962571 | 0.029868156 | HSPB9      | protein_coding                   |
| ENSG00000227199 | 29.44141009 | 12.01992556 | 1.296686514  | 0.007127788 | 0.030481405 | ST7-AS1    | antisense                        |
| ENSG00000267076 | 7.364716357 | 22.228911   | -1.591195799 | 0.00741594  | 0.03149235  | CCDC58P3   | processed_pseudogene             |
| ENSG00000165995 | 8.276143434 | 25.3422331  | -1.608575554 | 0.007646209 | 0.032319839 | CACNB2     | protein_coding                   |
| ENSG00000228137 | 13.86837443 | 2.758277054 | 2.341175802  | 0.007727971 | 0.032589979 | AP001469.2 | antisense                        |
| ENSG00000239405 | 4.438226417 | 17.15461574 | -1.940427016 | 0.008006612 | 0.033519353 | TMED10P2   | processed_pseudogene             |
| ENSG00000237975 | 26.78346713 | 9.960074289 | 1.432193331  | 0.008126409 | 0.033912169 | FLG-AS1    | antisense                        |
| ENSG00000176659 | 5.152627086 | 17.38126094 | -1.756564717 | 0.00828406  | 0.034440057 | C20orf197  | lincRNA                          |
| ENSG00000204745 | 66.85801022 | 29.52282917 | 1.179891952  | 0.008499192 | 0.03516538  | AC083899.1 | unprocessed_pseudogene           |
| ENSG00000279569 | 22.72702483 | 8.223542064 | 1.469366146  | 0.00872391  | 0.035932276 | AC020763.4 | TEC                              |
| ENSG00000273143 | 5.035982485 | 18.75449511 | -1.884529186 | 0.008954934 | 0.036699817 | AL355512.1 | lincRNA                          |
| ENSG00000135519 | 12.9121123  | 29.99383261 | -1.219668148 | 0.008999352 | 0.036835911 | KCNH3      | protein_coding                   |
| ENSG00000230513 | 32.36790003 | 14.36951981 | 1.172991256  | 0.00903307  | 0.036955512 | THAP7-AS1  | antisense                        |
| ENSG00000232838 | 41.23804496 | 20.44834546 | 1.009254797  | 0.009482857 | 0.038536568 | PET117     | protein_coding                   |
| ENSG00000267281 | 13.32688983 | 3.078893224 | 2.110967522  | 0.009715586 | 0.039239694 | AC023509.3 | protein_coding                   |
| ENSG00000213760 | 2.65240922  | 12.94499654 | -2.310610571 | 0.009874759 | 0.03973605  | ATP6V1G2   | protein_coding                   |
| ENSG00000179344 | 16.59485756 | 36.04206362 | -1.113600918 | 0.010184742 | 0.04071419  | HLA-DQB1   | protein_coding                   |
| ENSG00000173261 | 13.15064626 | 2.693827823 | 2.276467717  | 0.011111642 | 0.043654778 | PLAC8L1    | protein_coding                   |
| ENSG00000269720 | 38.67857522 | 18.74268642 | 1.045079317  | 0.011341377 | 0.044429857 | CCDC194    | protein_coding                   |
| ENSG00000244480 | 15.58005959 | 3.715572651 | 2.057411389  | 0.011445558 | 0.044805937 | AC005154.2 | transcribed_processed_pseudogene |

|                 |             |             |              |             |             |            |                                    |
|-----------------|-------------|-------------|--------------|-------------|-------------|------------|------------------------------------|
| ENSG00000258654 | 16.68446954 | 4.739167521 | 1.809279536  | 0.011534758 | 0.045047796 | AC026495.1 | lincRNA                            |
| ENSG00000165887 | 26.61900707 | 10.86608079 | 1.289000039  | 0.011559715 | 0.04509167  | ANKRD2     | protein_coding                     |
| ENSG00000255031 | 36.61463377 | 17.37941089 | 1.073353605  | 0.011569495 | 0.04510094  | AP002807.1 | antisense                          |
| ENSG00000215861 | 6.739927674 | 19.91964997 | -1.561010097 | 0.012022735 | 0.046534537 | AC245297.1 | unprocessed_pseudogene             |
| ENSG00000144837 | 15.48342367 | 4.412647002 | 1.804511459  | 0.012023074 | 0.046534537 | PLA1A      | protein_coding                     |
| ENSG00000039139 | 10.14305848 | 26.02344445 | -1.35078498  | 0.012104872 | 0.046763002 | DNAH5      | protein_coding                     |
| ENSG00000258727 | 14.75901866 | 3.783223359 | 1.968521854  | 0.012198908 | 0.047059887 | AL135999.1 | antisense                          |
| ENSG00000180878 | 20.3579265  | 7.153211009 | 1.504736773  | 0.012312168 | 0.047429994 | C11orf42   | protein_coding                     |
| ENSG00000165874 | 40.49881792 | 18.27118437 | 1.150350483  | 0.012353243 | 0.047565919 | SHLD2P1    | transcribed_unprocessed_pseudogene |
| ENSG00000101280 | 14.86161539 | 32.21665699 | -1.118314129 | 0.012543364 | 0.048207594 | ANGPT4     | protein_coding                     |
| ENSG00000115155 | 15.78453701 | 4.496160715 | 1.819259507  | 0.01277395  | 0.0490021   | OTOF       | protein_coding                     |
| ENSG00000134259 | 11.2537182  | 26.90448212 | -1.258946424 | 0.01278092  | 0.04900916  | NGF        | protein_coding                     |
| ENSG00000112902 | 16.36781813 | 5.150553188 | 1.671658117  | 0.01287825  | 0.049272166 | SEMA5A     | protein_coding                     |
| ENSG00000182459 | 15.7074827  | 4.077519263 | 1.942013809  | 0.012979775 | 0.049594816 | TEX19      | protein_coding                     |
| ENSG00000110944 | 18.95062405 | 38.45582856 | -1.022184443 | 0.012985952 | 0.049606878 | IL23A      | protein_coding                     |
